# Supplementary material for: Solvent-free synthesis of triazines using N-halosulfonamides
Source: Royal Society of Chemistry journal article supplement (doi:10.1039/c4ra10892b), 2014-12-03

## Solvent-free Synthesis of Triazines Using *N*-Halosulfonamides

Ramin Ghorbani-Vaghei<sup>a,\*</sup>, Azadeh Shahriari<sup>a</sup>, Zahra Salimi<sup>a</sup>, Somayeh Hajinazari<sup>b</sup>

1. **3-(3-Methoxyphenyl)-5,6-di(*p*-tolyl)-1,2,4-triazine (Table 2, entry 1):** Yellow powder. Mp: 100-103 °C (99°C)<sup>28</sup>; <sup>1</sup>H NMR (400 MHz CDCl<sub>3</sub>): δ<sub>H</sub> (ppm) 2.41 (s, CH<sub>3</sub>, 3H), 2.42 (s, CH<sub>3</sub>, 3H), 3.95 (s, CH<sub>3</sub>, 3H), 7.11-8.28 (m, CH aromatic, 12H). <sup>13</sup>C NMR (100 MHz, CDCl<sub>3</sub>): δ<sub>C</sub> (ppm) 21.43, 21.52, 55.49, 112.67, 117.93, 120.84, 129.25, 129.30, 129.33, 129.81, 132.80, 133.13, 136.33, 139.67, 141.17, 155.32, 155.41, 160.02, 160.75. MS: *m/z* 367. . Anal. Calcd for C<sub>24</sub>H<sub>21</sub>N<sub>3</sub>O: C, 78.45; H, 5.76; N, 11.44; Found: C, 77.43; H, 5.83; N, 11.09.

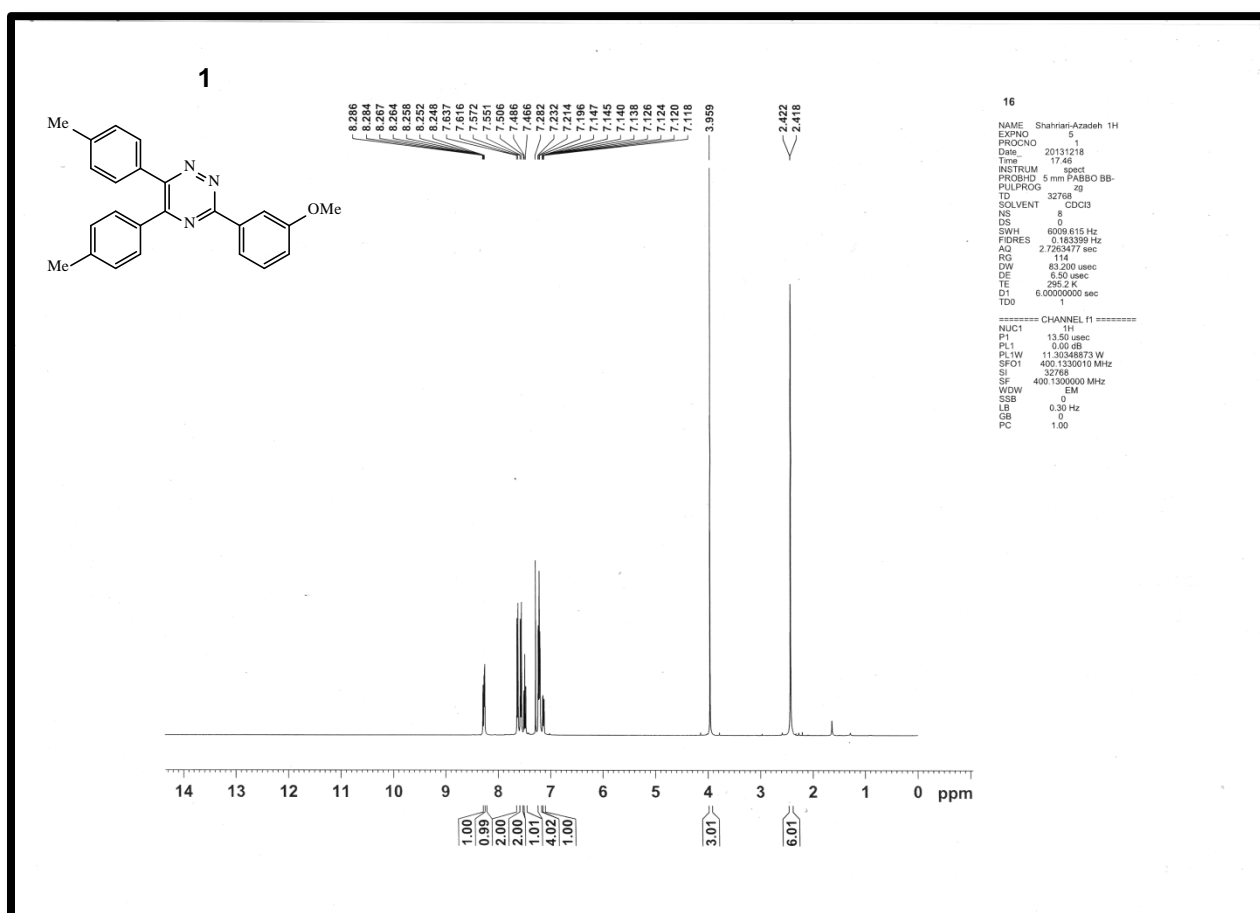

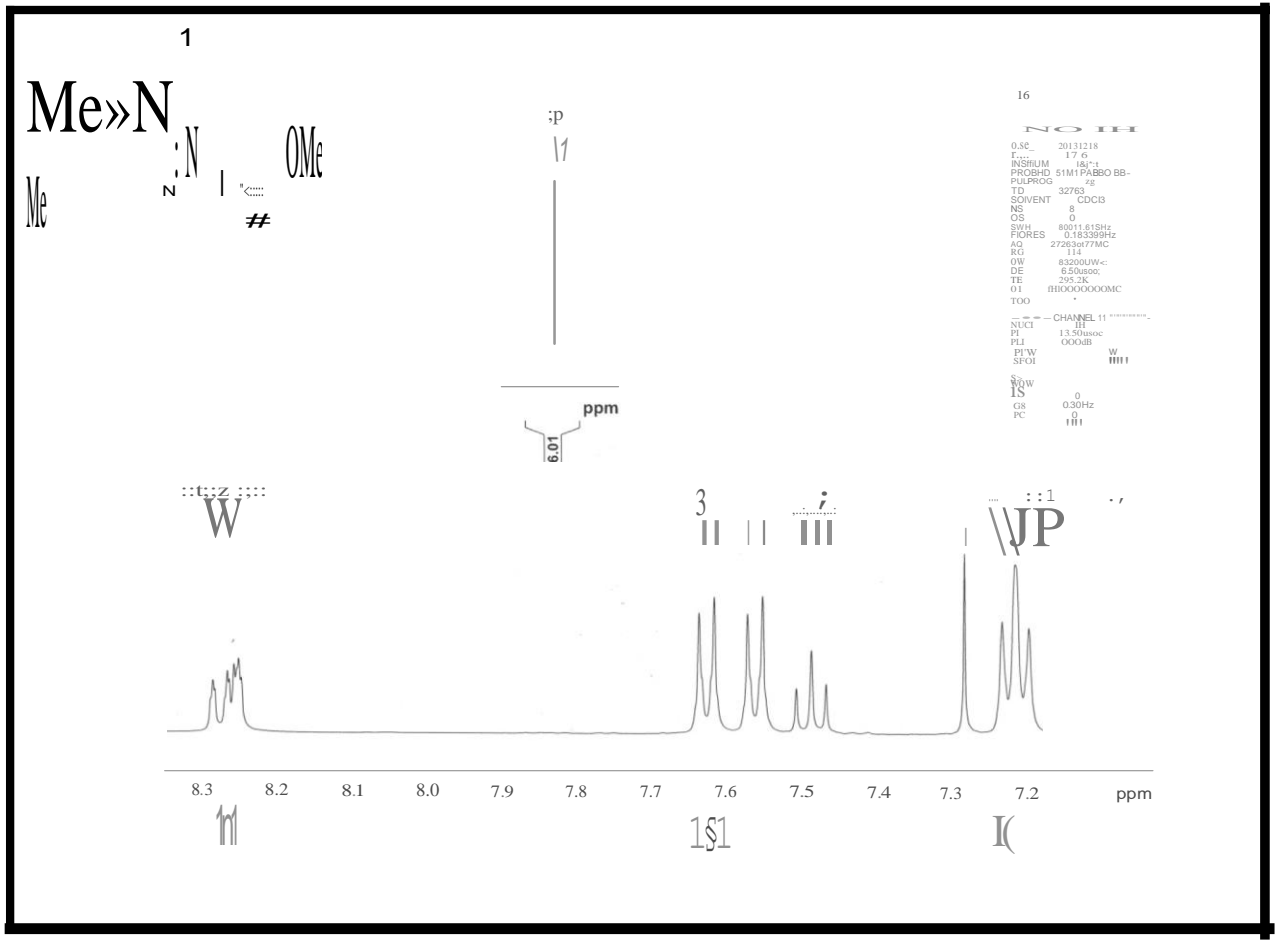



DATE 20 12 91 TIME 14 12 12 OPERATOR ID GHAEMI

RUN 28 ID SH16 WEIGHT 2.584

SIGNALS

CARBON 77.43%  
HYDROGEN 5.83%  
NITROGEN 11.09%

ZR 1656  
NR 3407  
CR 31443  
HR 36913

BLANKS 82 201 314  
KFACTORS 13.971 35.007 5.013

OXFILL COMB BOOST1 BOOST2  
0 0 0 0

FILL TIME 10 SECONDS

DATE 20 12 91 TIME 14 16 36 OPERATOR ID GHAEMI

RUN 29 BLANK RUN

SIGNALS

CARBON 96  
HYDROGEN 200  
NITROGEN 305

ZR 1657  
NR 1962  
CR 2058  
HR 2258

AVERAGE RESULTS

CARBON 89  
HYDROGEN 200  
NITROGEN 309

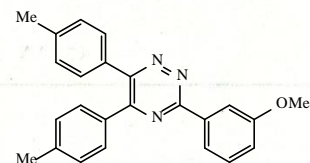

NH-16 40 (0.626)

Solid Probe  
Scan E1+  
1.38e7

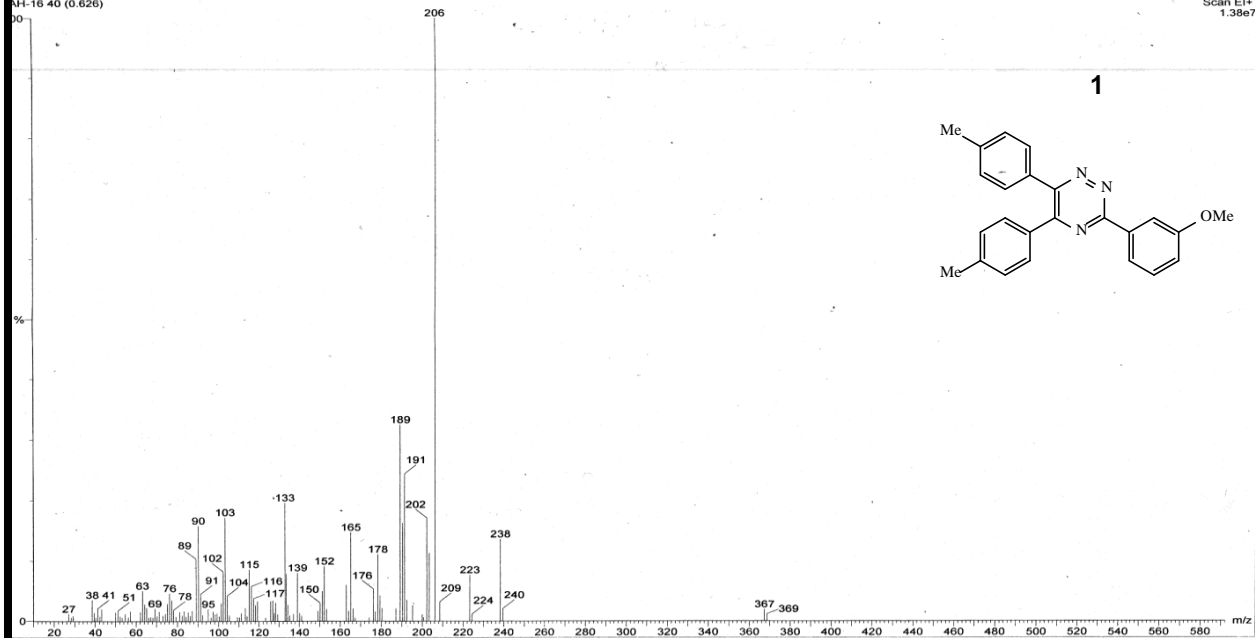

2. **5,6-Bis(4-methoxyphenyl)-3-phenyl-1,2,4-triazine** (Table 2, entry 2): Yellow powder. Mp: 155-158 °C (165 °C)<sup>28</sup>; IR (KBr): 2967, 2938, 2842, 1605, 1574, 1488, 1254; <sup>1</sup>H NMR (400 MHz CDCl<sub>3</sub>): δ<sub>H</sub> (ppm) 3.87 (s, OCH<sub>3</sub>, 3H), 3.88 (s, OCH<sub>3</sub>, 3H), 6.90-8.68 (m, CH aromatic, 13H). <sup>13</sup>C NMR (100 MHz, CDCl<sub>3</sub>): δ<sub>C</sub> (ppm) 55.34, 55.40, 113.99, 114.12, 128.19, 128.23, 128.76, 130.76, 131.30, 131.54, 135.04, 154.58, 154.76, 160.67, 160.70, 161.74. MS: *m/z* 369. Anal. Calcd for C<sub>23</sub>H<sub>19</sub>N<sub>3</sub>O<sub>2</sub>: C, 74.78; H, 5.18; N, 11.37; Found: C, 74.77; H, 4.87; N, 11.09.

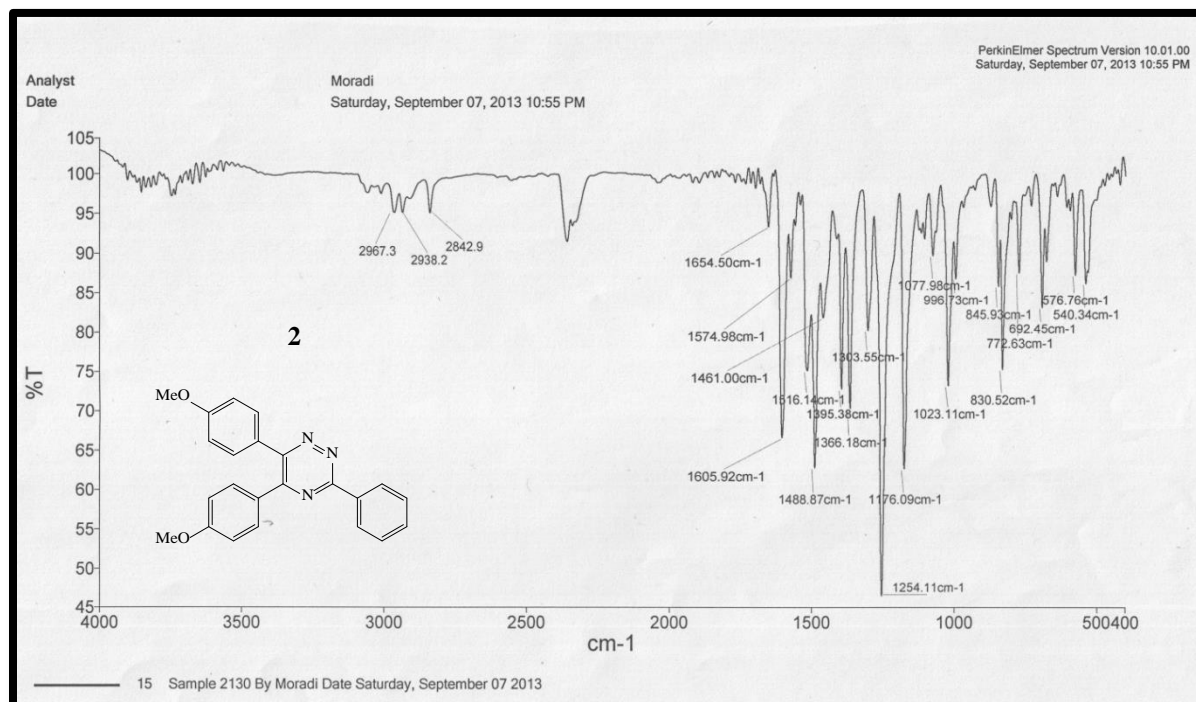

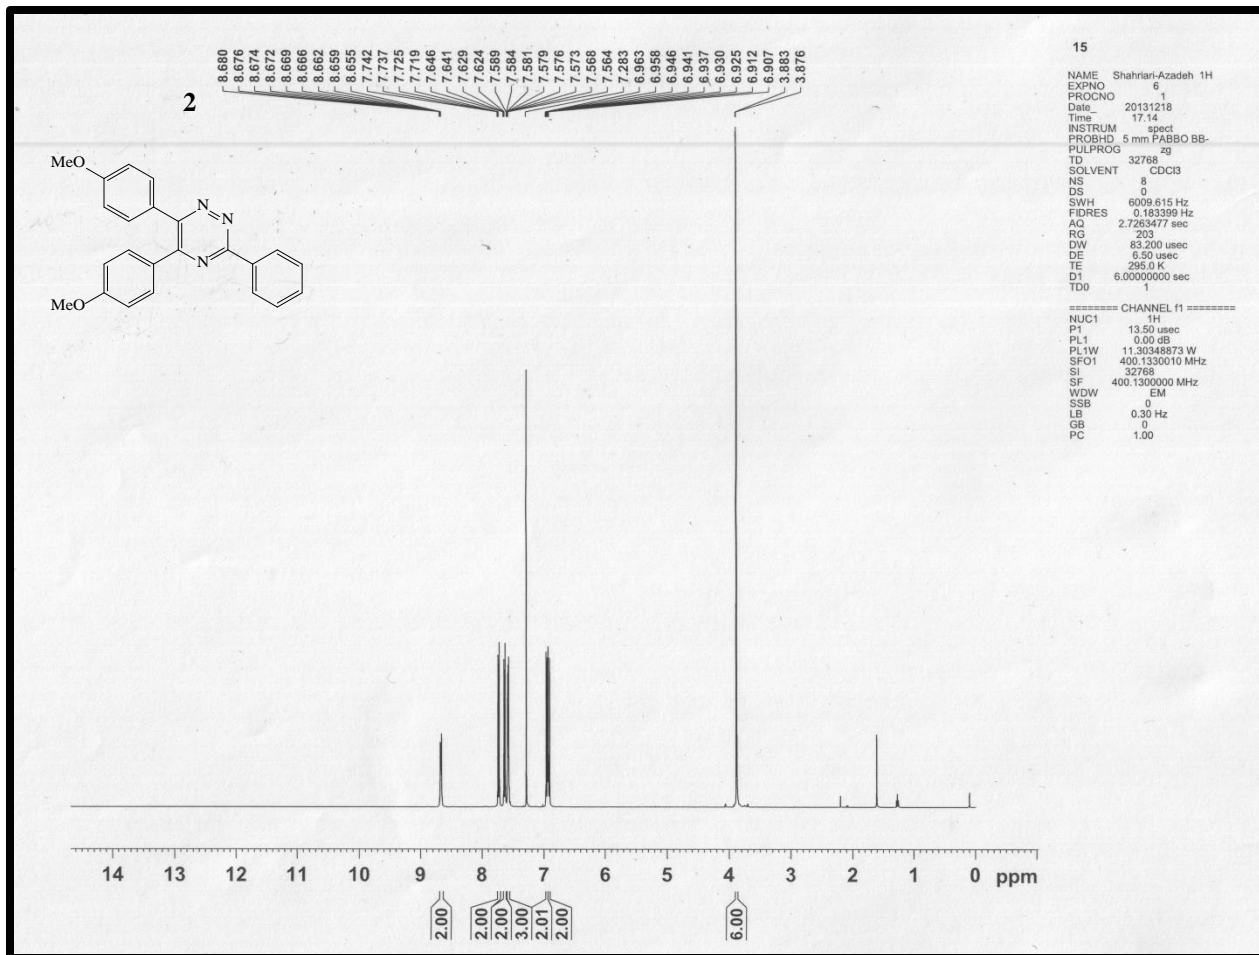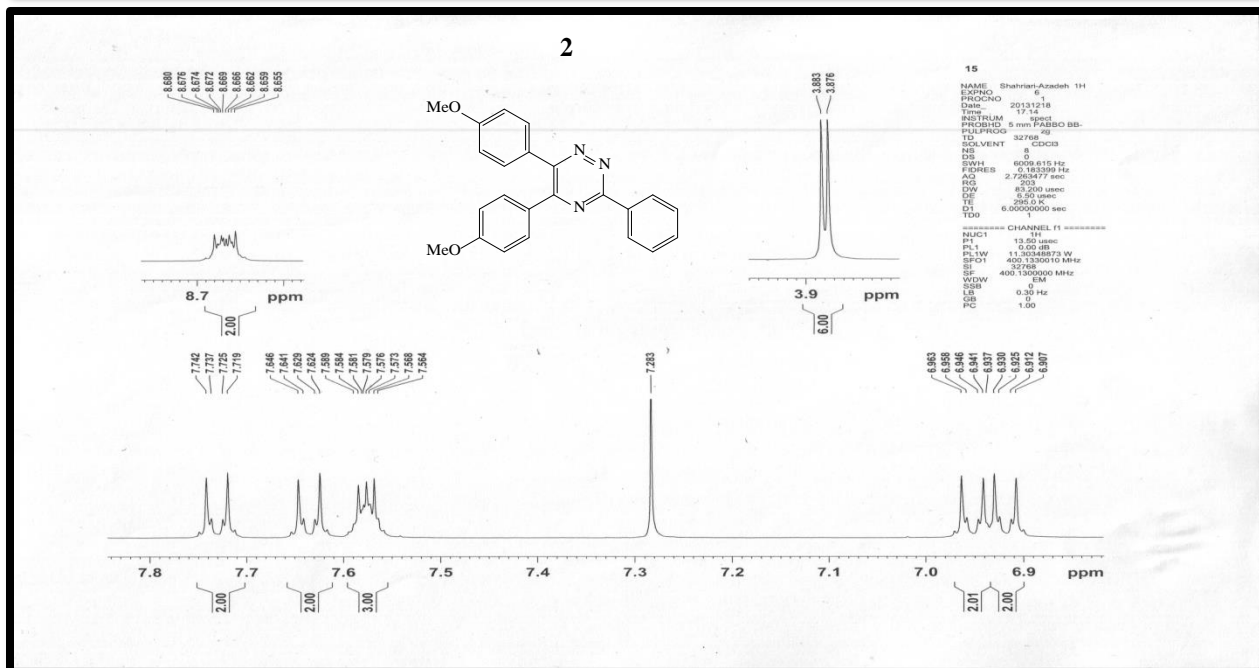

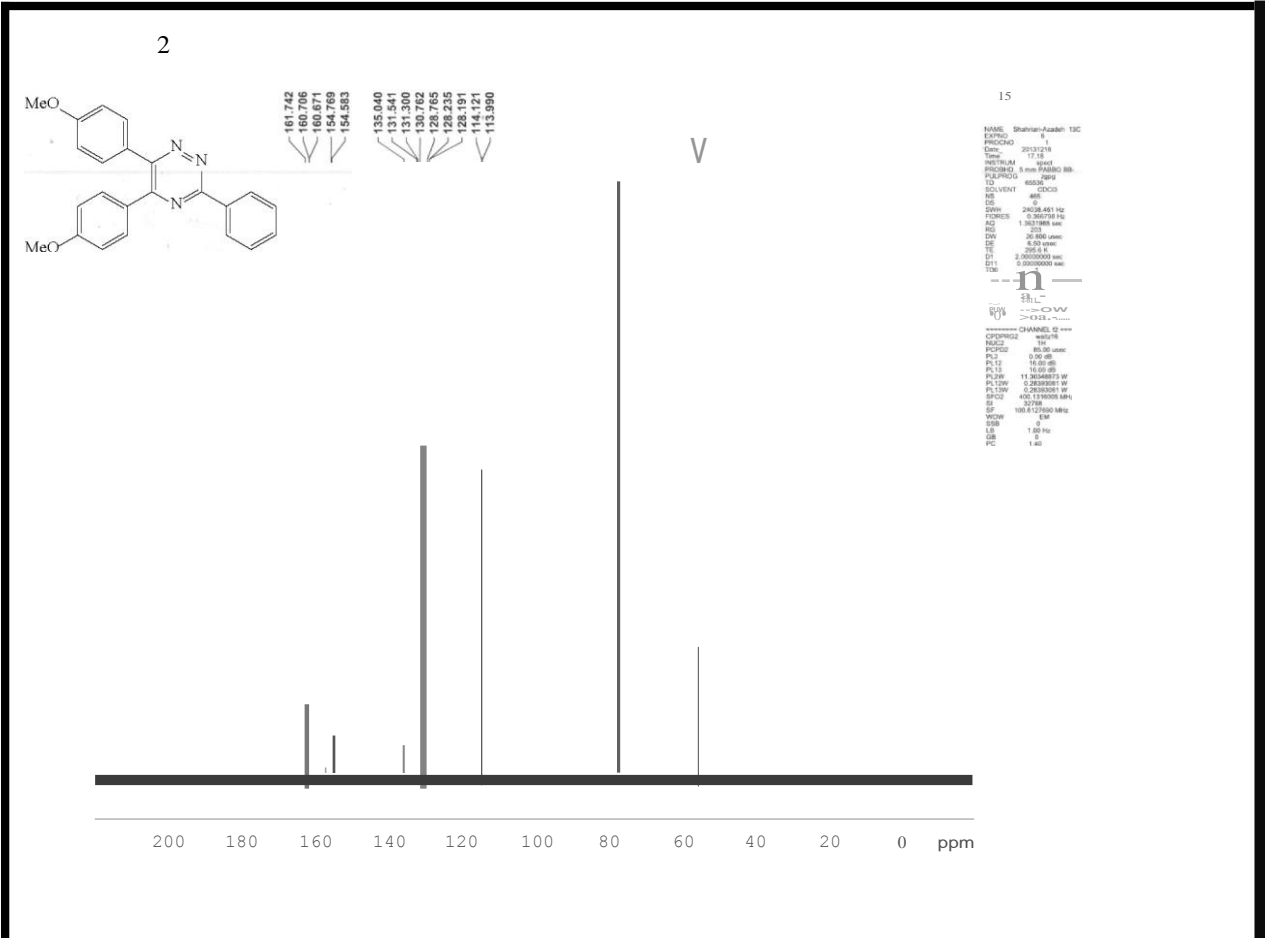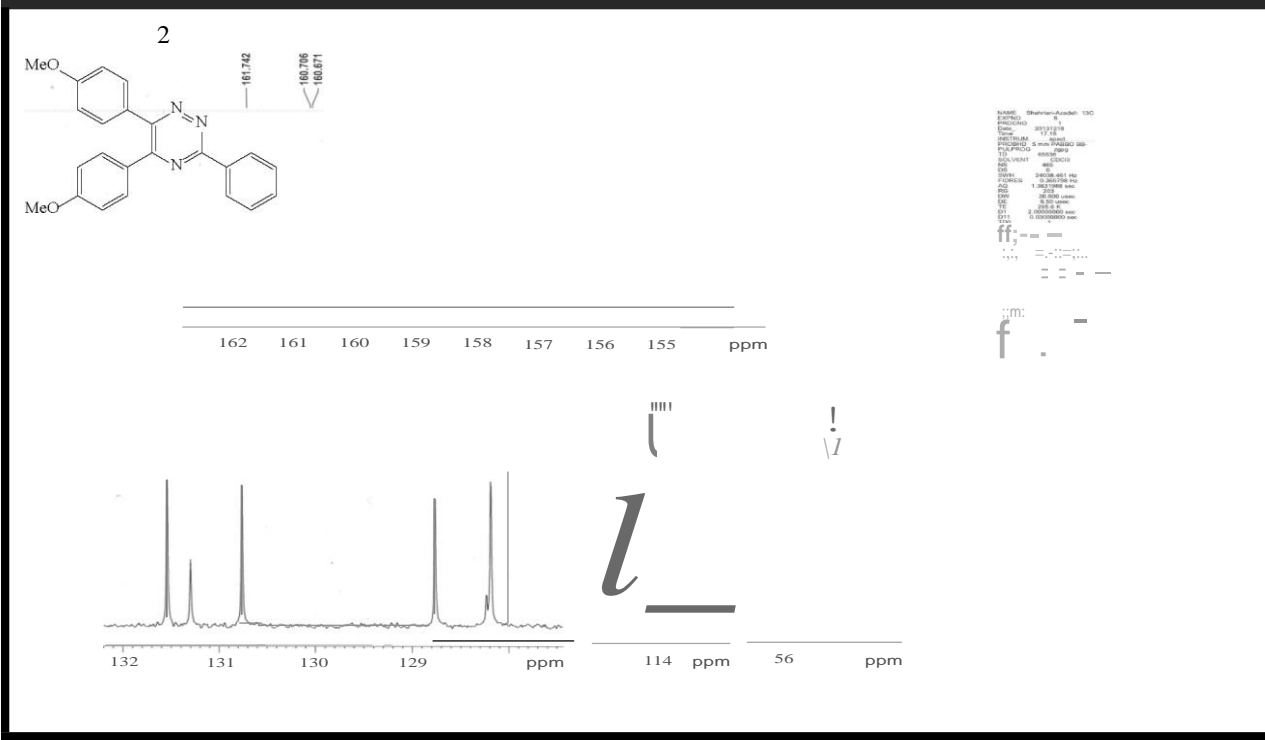





- 3. 3-Methylphenanthro[9,10-e][1,2,4]triazine (Table 2, entry 3):** Yellow powder. Mp: 166-168 °C; IR (KBr): 3117, 3065, 1699, 1672, 1185, 948; <sup>1</sup>H NMR (400 MHz, CDCl<sub>3</sub>): δ<sub>H</sub> (ppm) 2.54 (s, CH<sub>3</sub>, 3H), 7.28-8.34 (m, CH aromatic, 8H) <sup>13</sup>C NMR (100 MHz, CDCl<sub>3</sub>): δ<sub>C</sub>(ppm) 19.93, 123.01, 123.13, 124.2, 128.06, 128.83, 129.15, 129.35, 130.09, 130.82, 131.67, 134.98, 136.38, 175.09. MS: *m/z* 245.

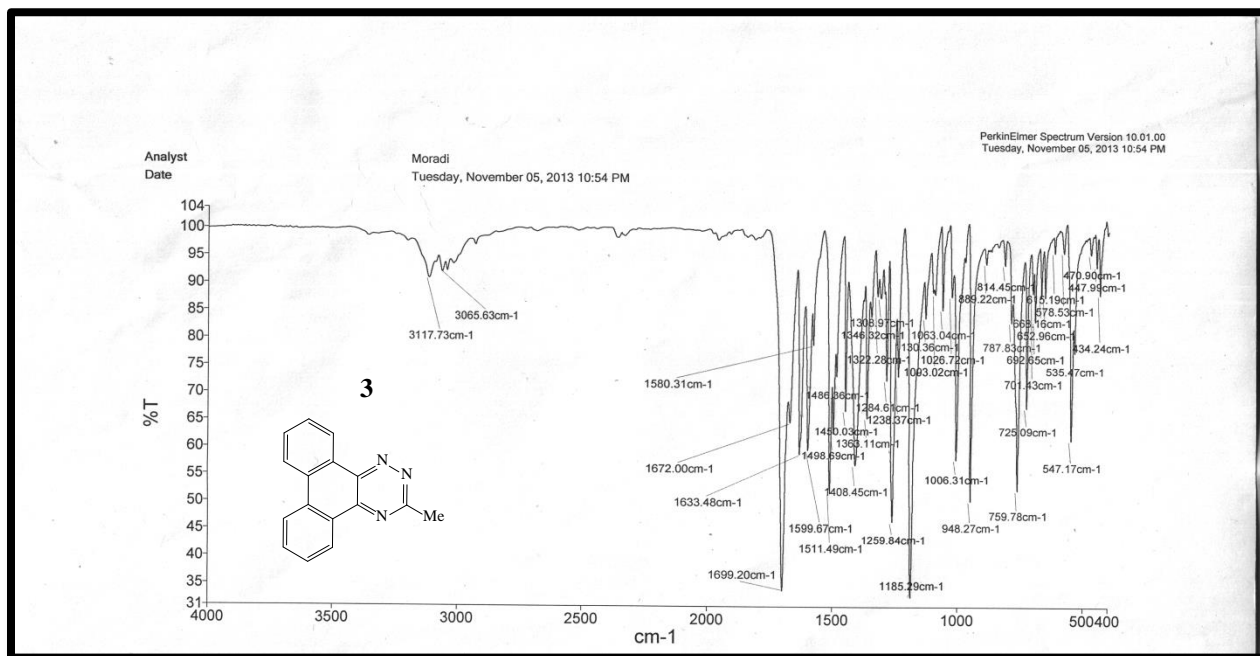

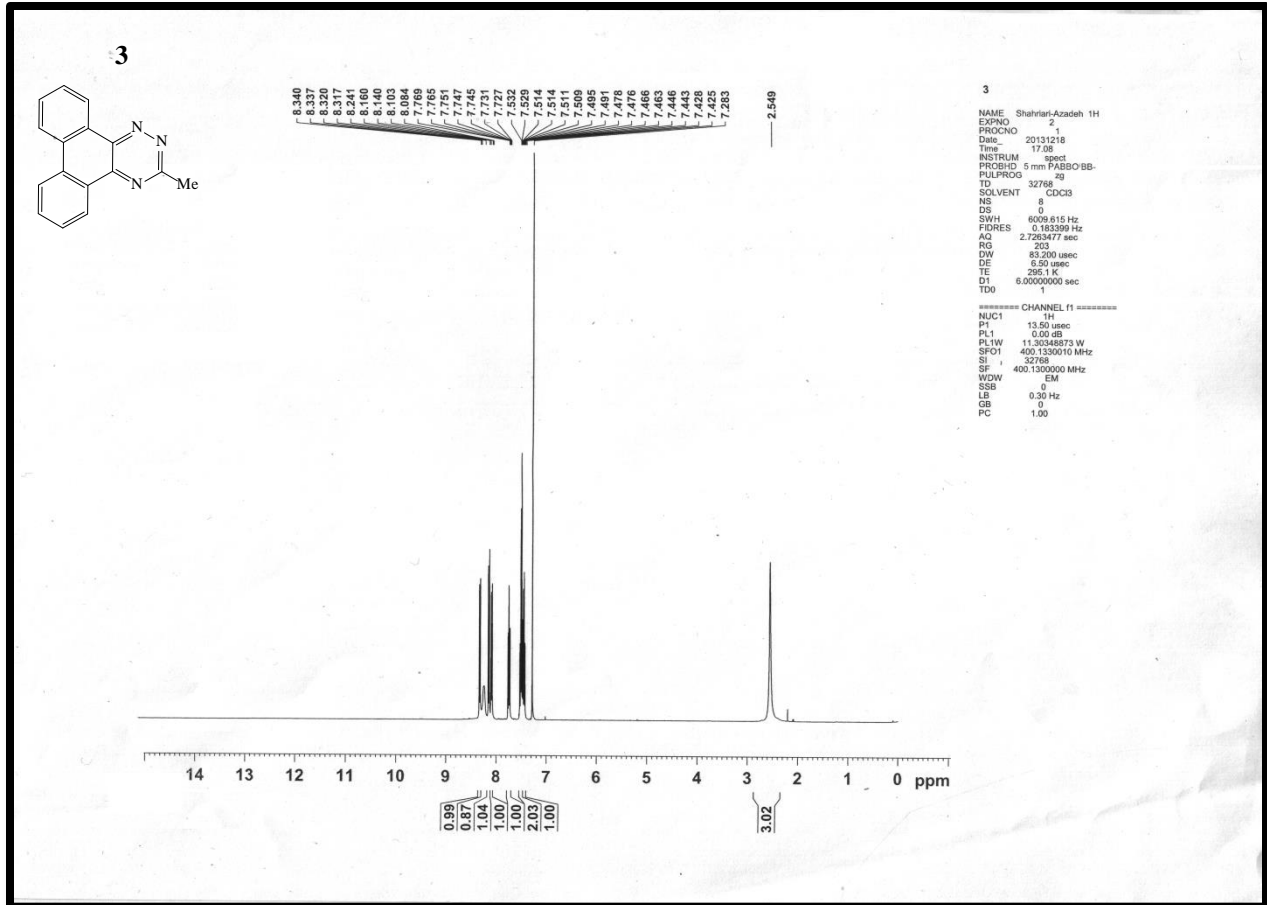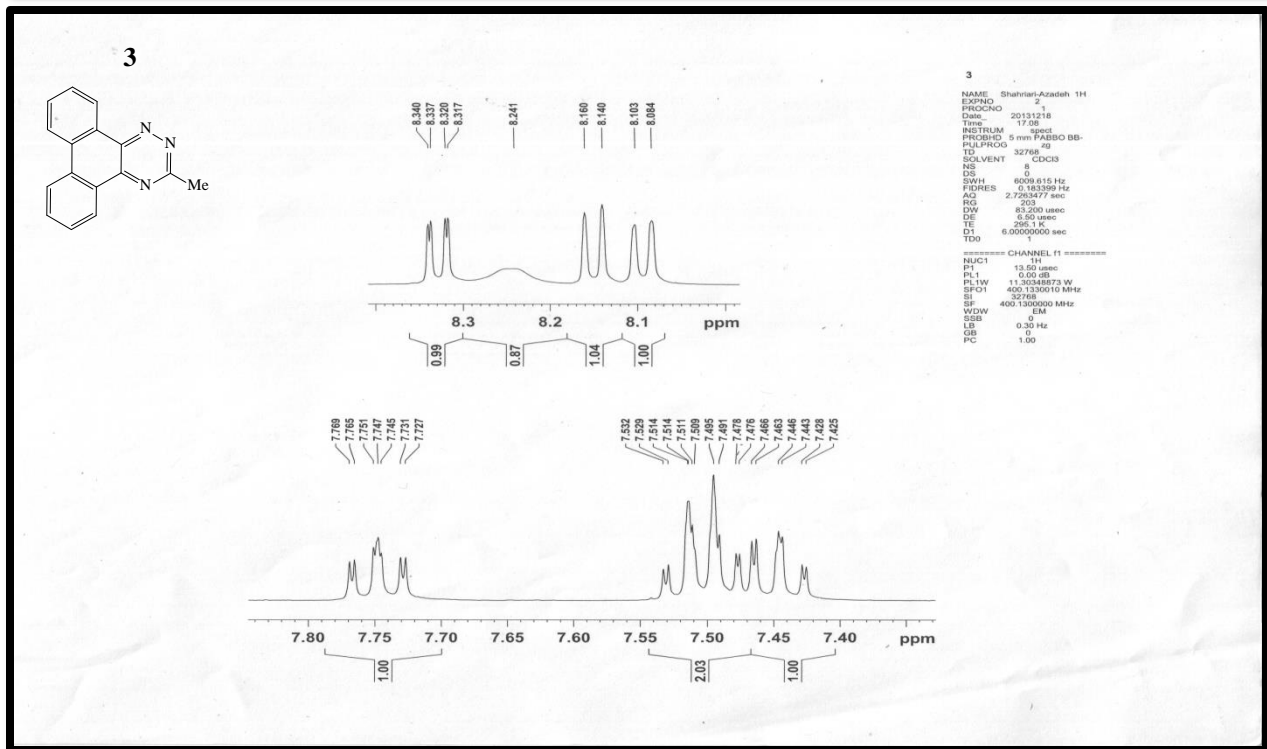

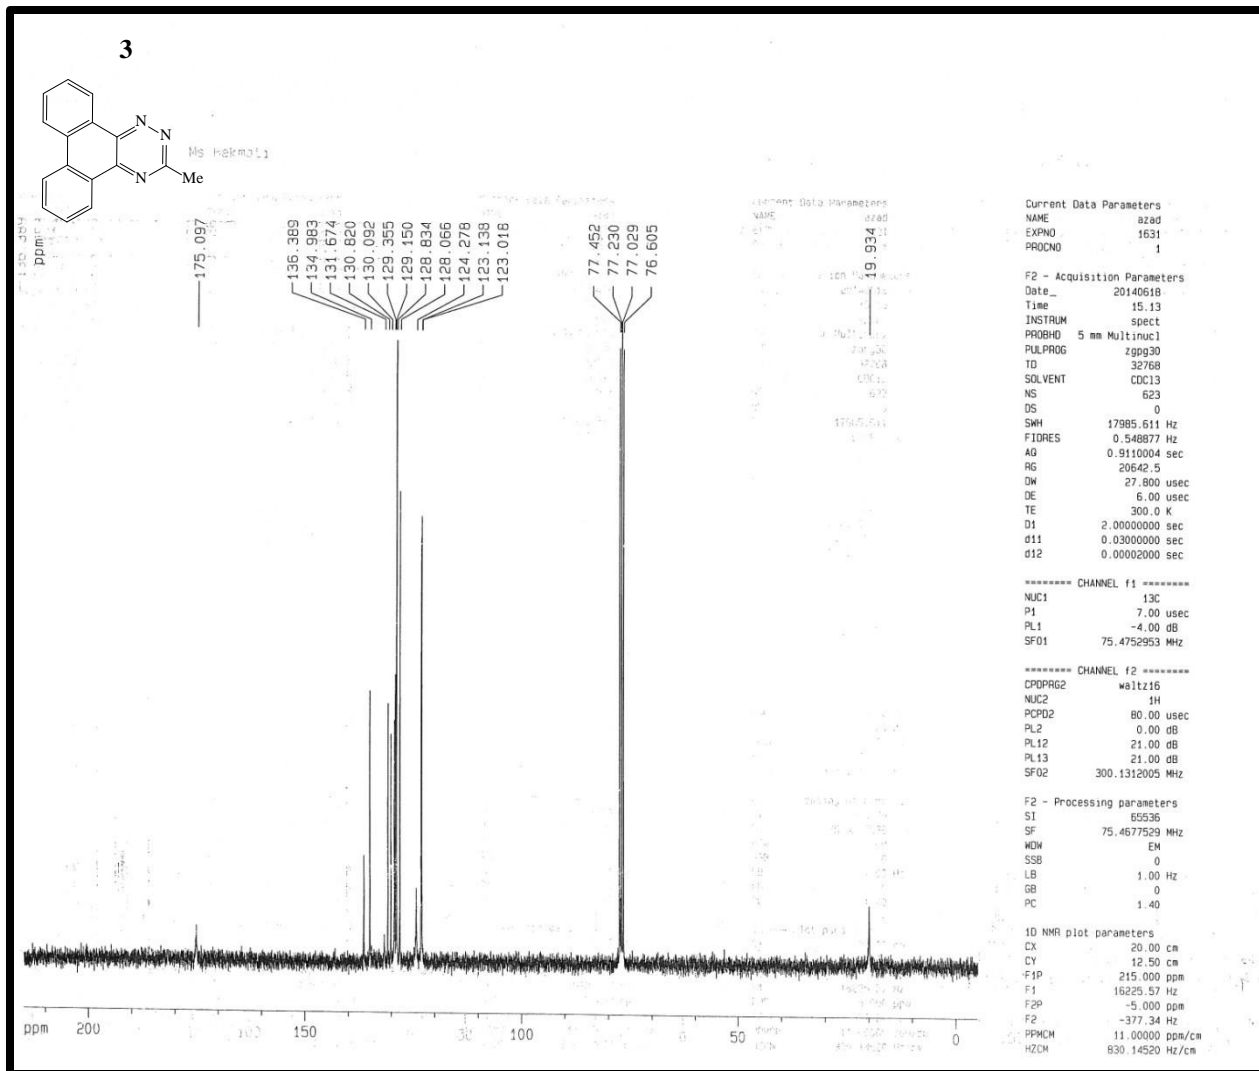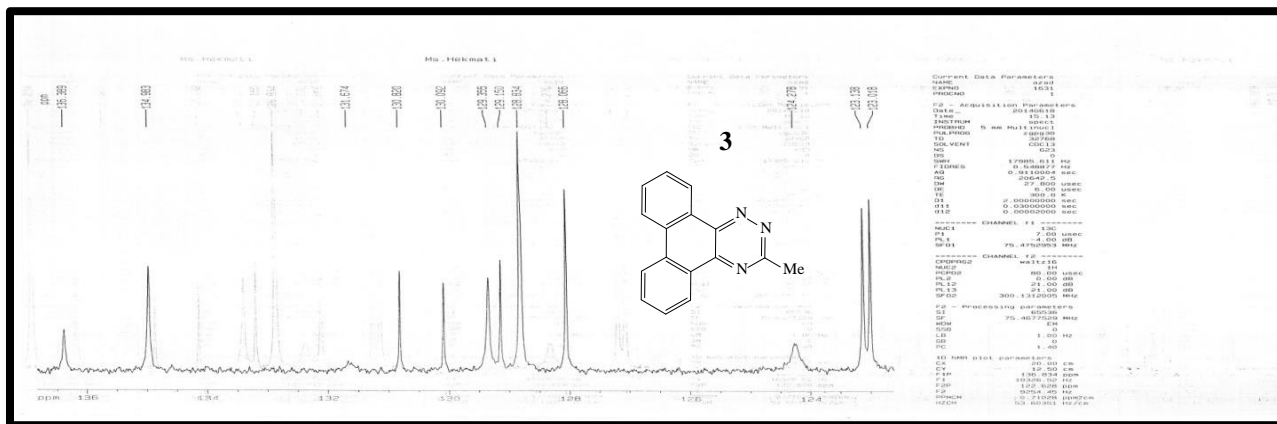

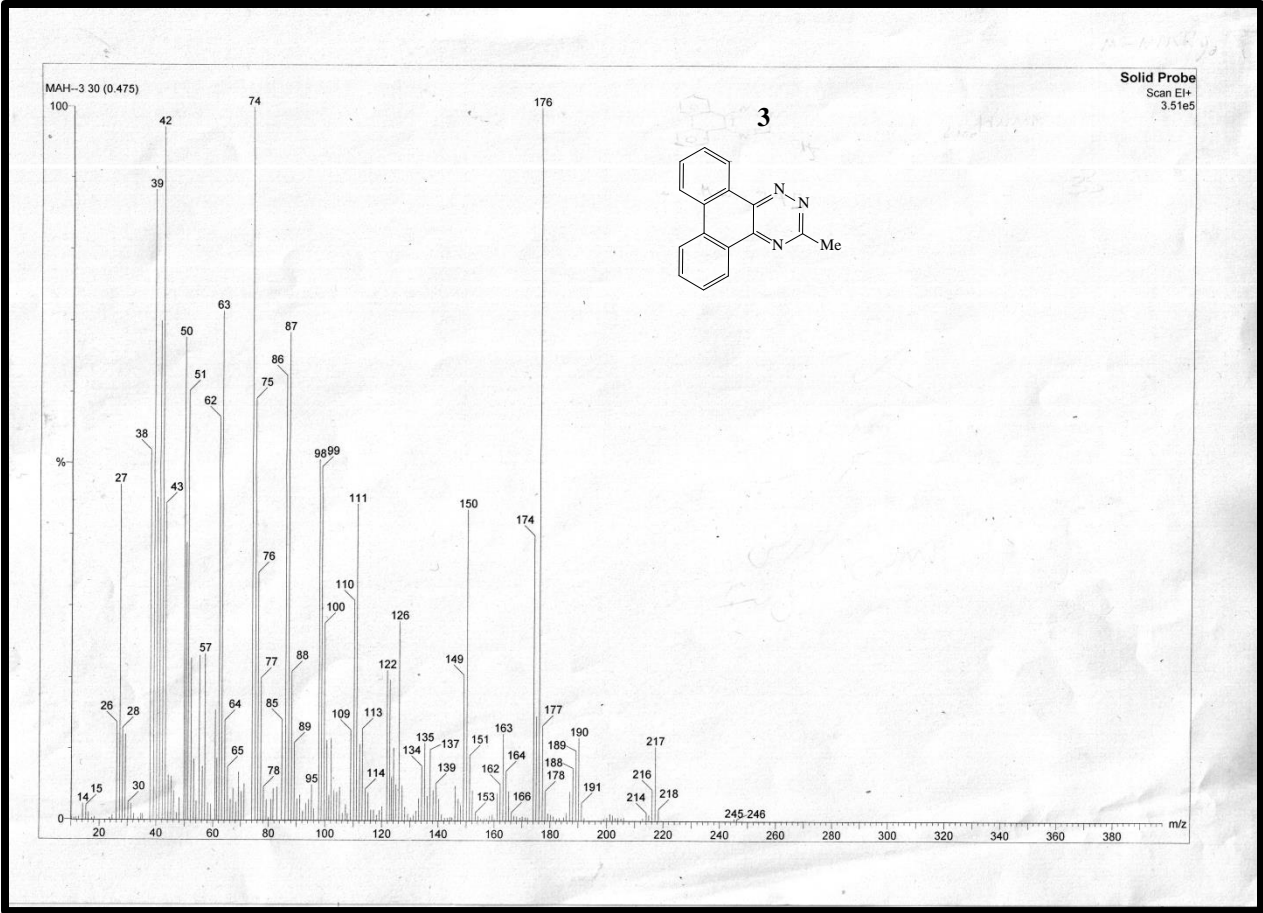

4. **5,6-Bis(4-methoxyphenyl)-3-(*p*-tolyl)-1,2,4-triazine (Table 2, entry 4):** Yellow powder. Mp: 146-148 °C (149°C)<sup>28</sup>; IR (KBr): 3042, 3014, 2961, 2839, 1606, 1577, 1484, 1177, 832 ; <sup>1</sup>H NMR (400 MHz, CDCl<sub>3</sub>): δ<sub>H</sub> (ppm) 2.47 (s, CH<sub>3</sub>, 3H), 3.86 (s, OCH<sub>3</sub>, 3H), 3.86 (s, OCH<sub>3</sub>, 3H), 6.89-8.56(m, CH aromatic, 12H). <sup>13</sup>C NMR (100 MHz, CDCl<sub>3</sub>): δ<sub>c</sub> (ppm) 55.33, 55.38, 113.95, 114.08, 128.15, 128.28, 128.32, 129.54, 130.73, 131.53, 132.30, 154.50, 154.53, 160.63, 160.73, 161.67. MS: *m/z* 383.

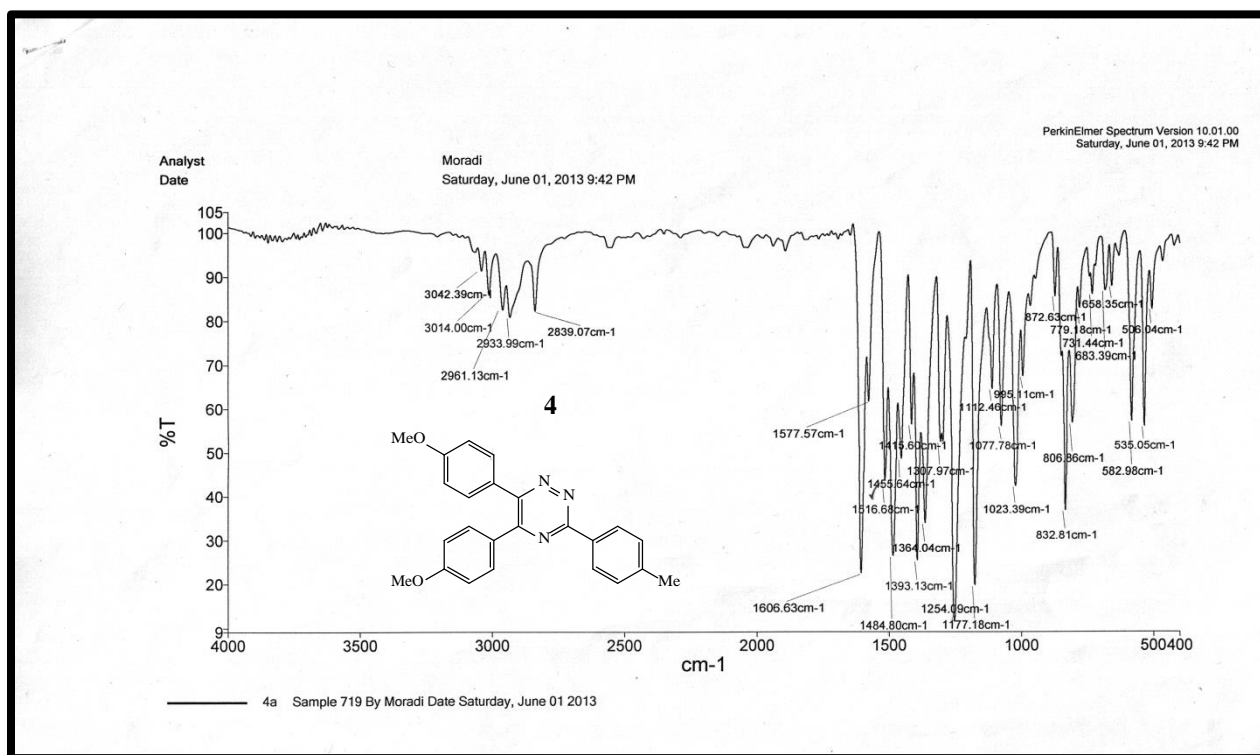

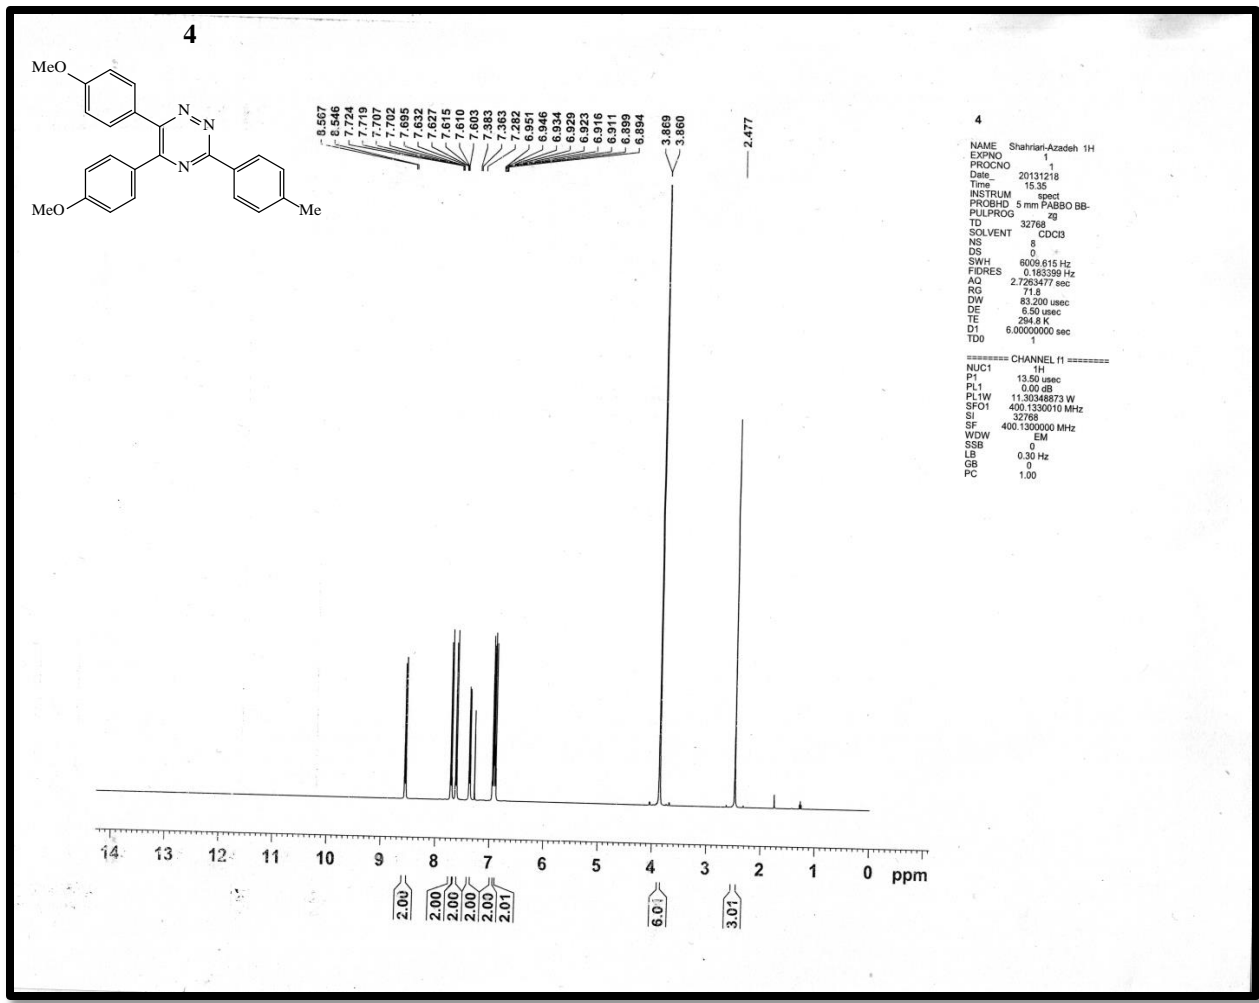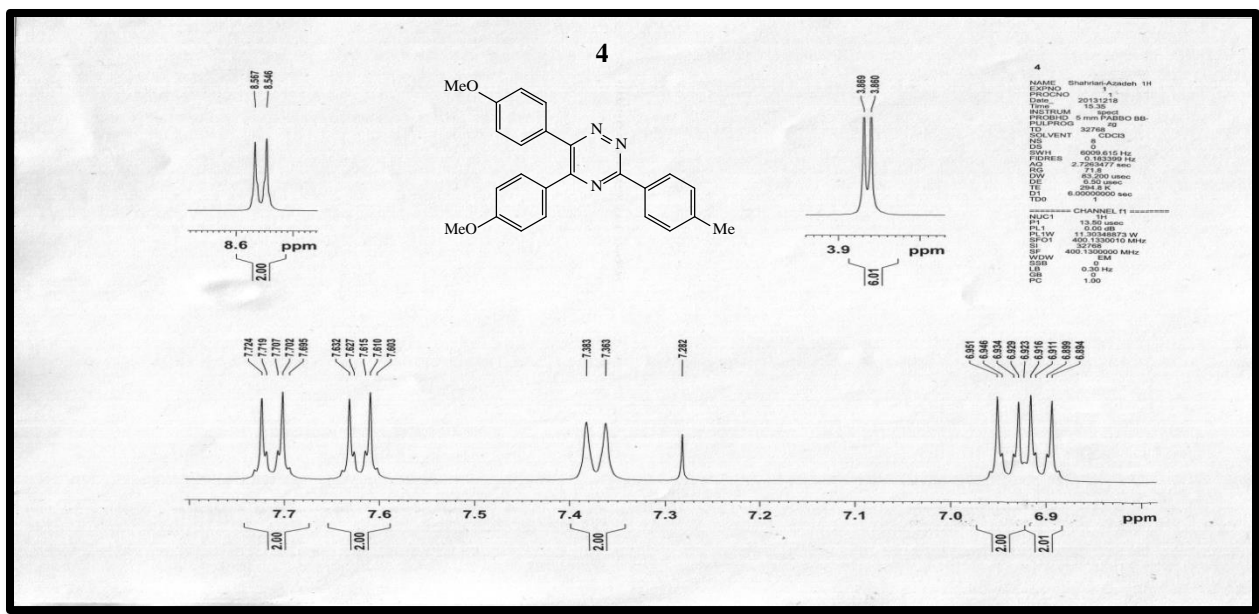

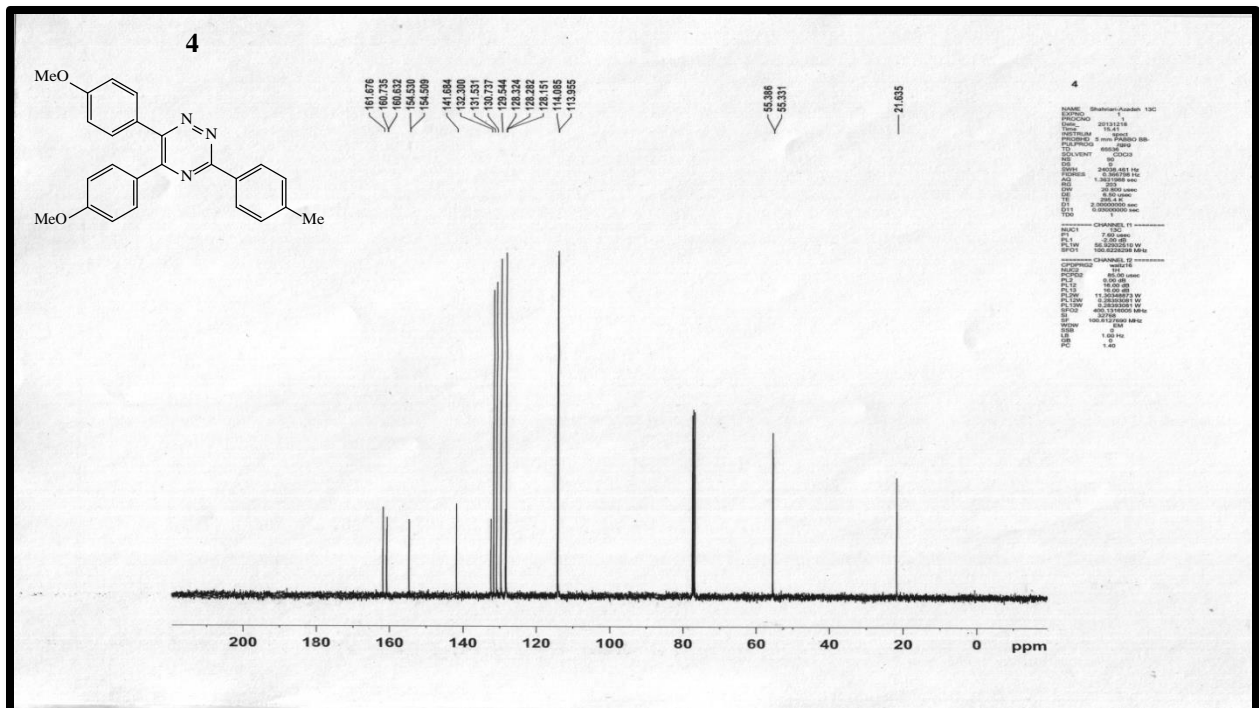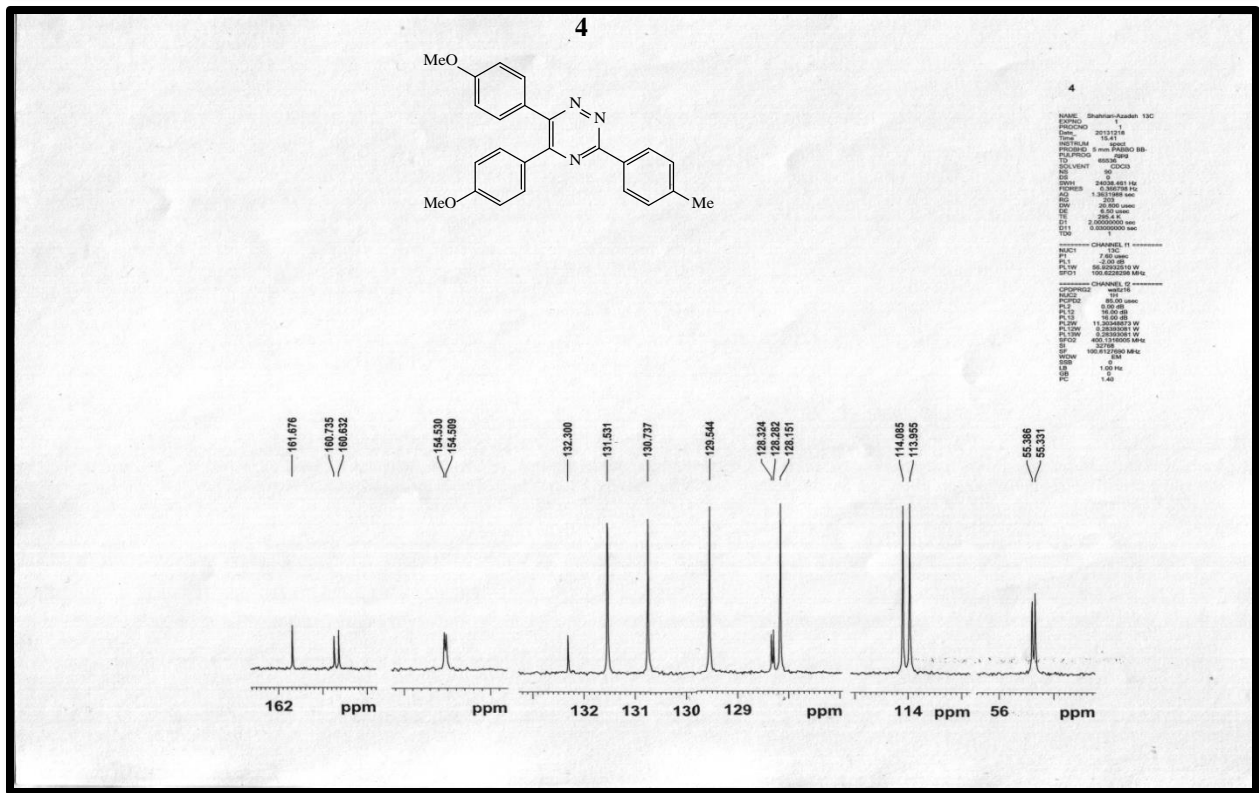

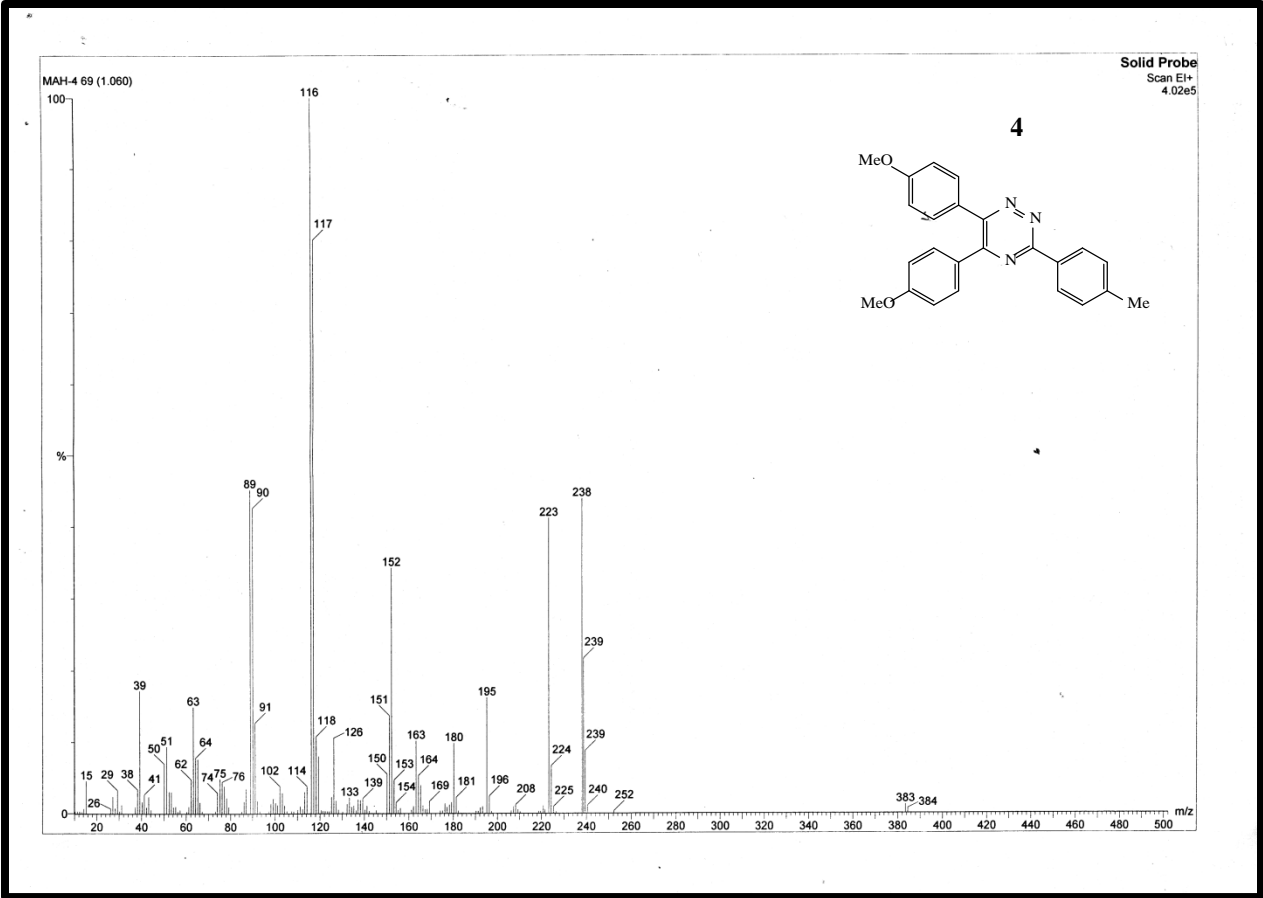



**5. 3-(3-Methoxyphenyl)-5,6-diphenyl-1,2,4-triazine (Table 2, entry 5):** yellow powder. Mp: 133-135 °C; IR (KBr): 3066, 3004, 2945, 1607, 1582, 1499, 690; <sup>1</sup>H NMR (400 MHz, CDCl<sub>3</sub>): δH (ppm) 3.95 (s, OCH<sub>3</sub>, 3H), 6.89-8.25 (m, CH aromatic, 14H). <sup>13</sup>C NMR (100 MHz, CDCl<sub>3</sub>): δc (ppm) 55.50, 112.79, 118.08, 120.92, 128.53, 128.62, 129.47, 129.60, 129.89, 130.73, 135.51, 135.86, 136.15, 155.52, 155.57, 160.07, 161.06. MS: m/z 340, Anal. Calcd for C<sub>22</sub>H<sub>17</sub>N<sub>3</sub>O: C, 77.86; H, 5.05; N, 12.38; Found: C, 78.55; H, 5.18; N, 12.54.

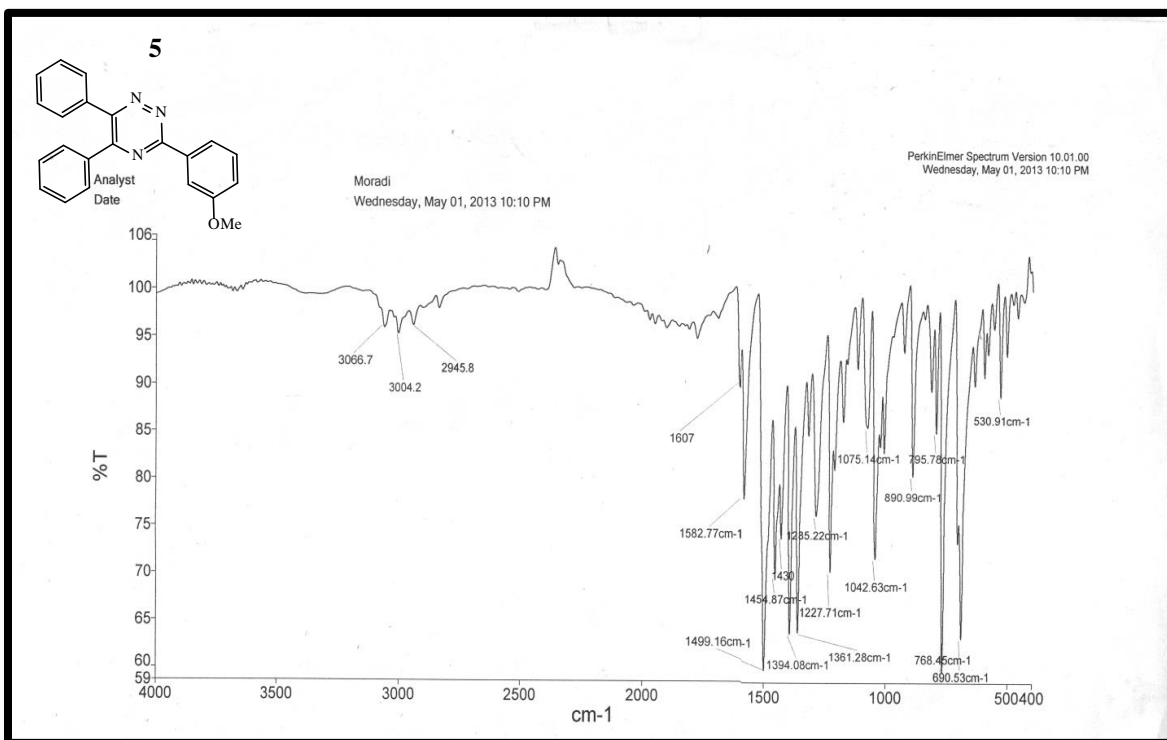

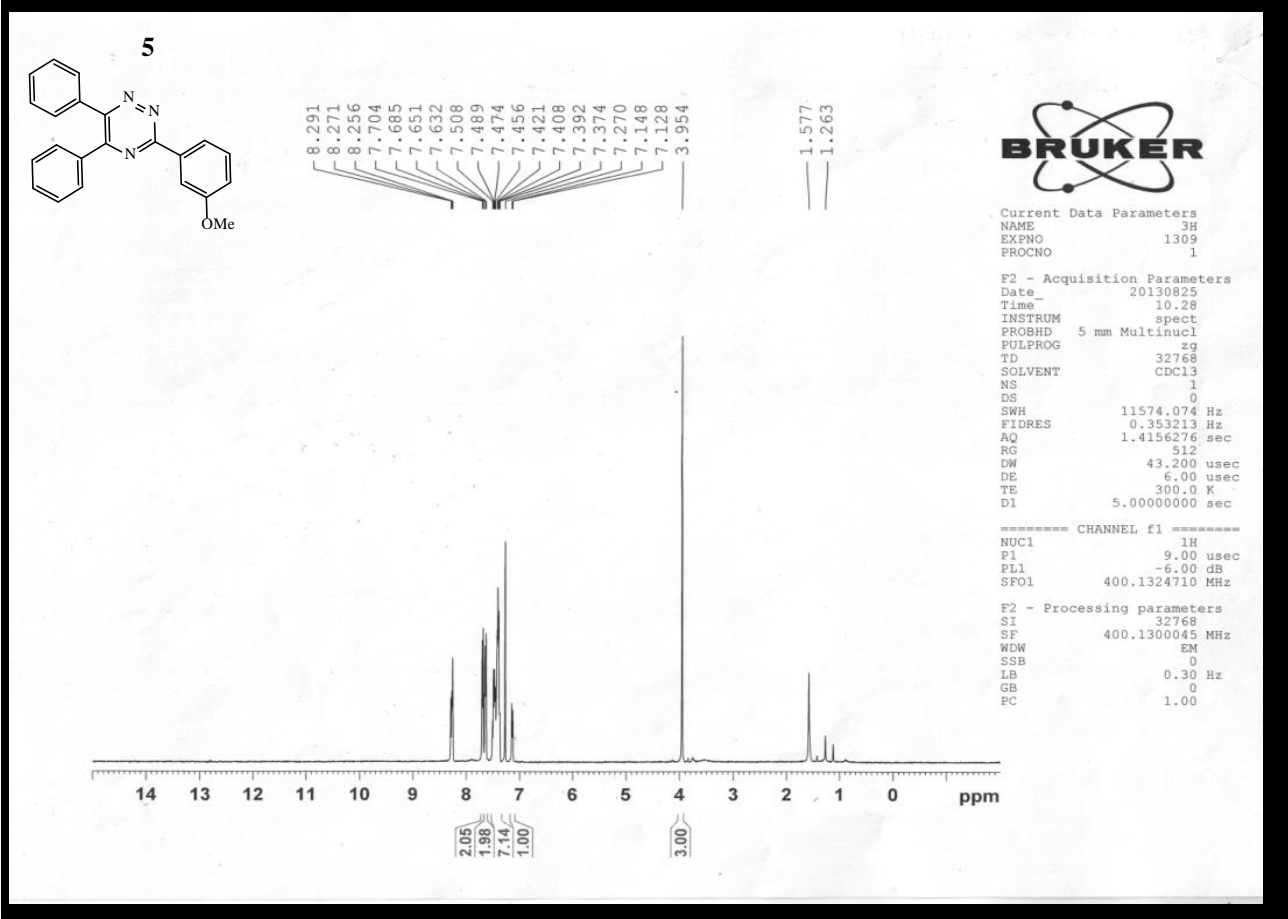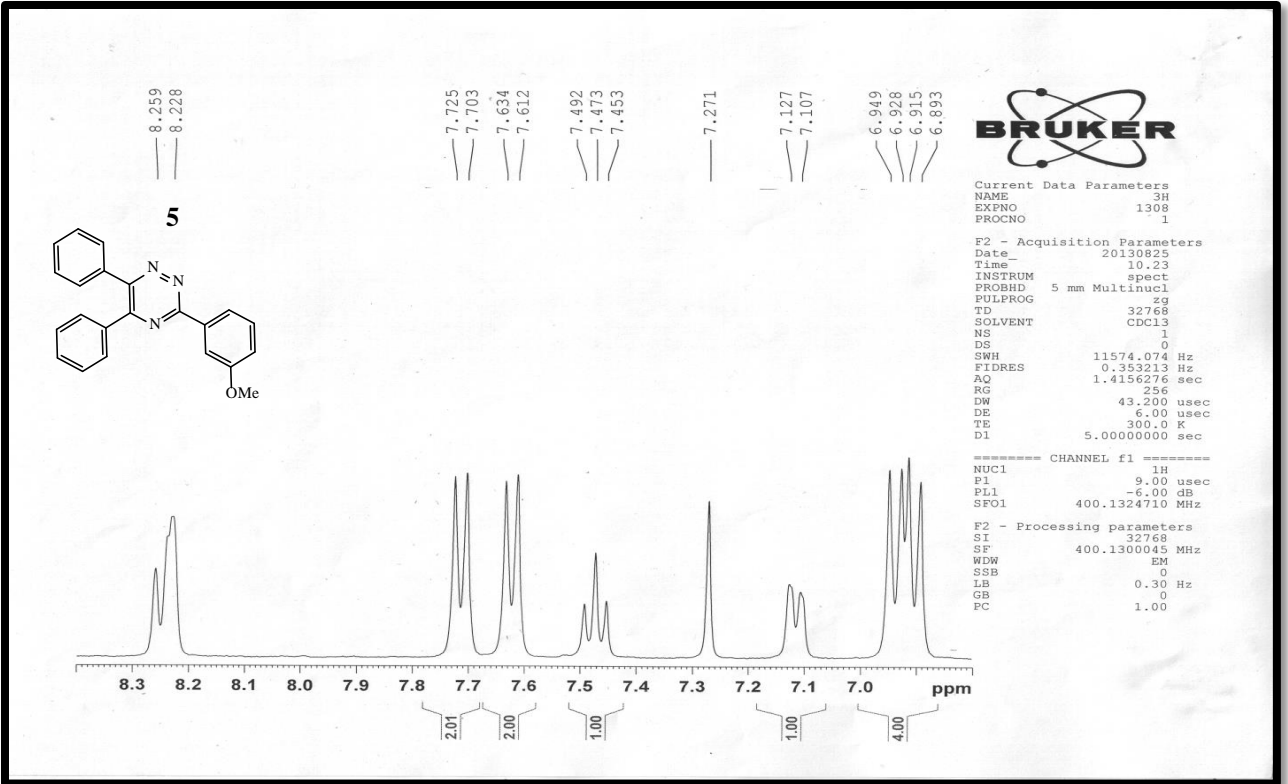

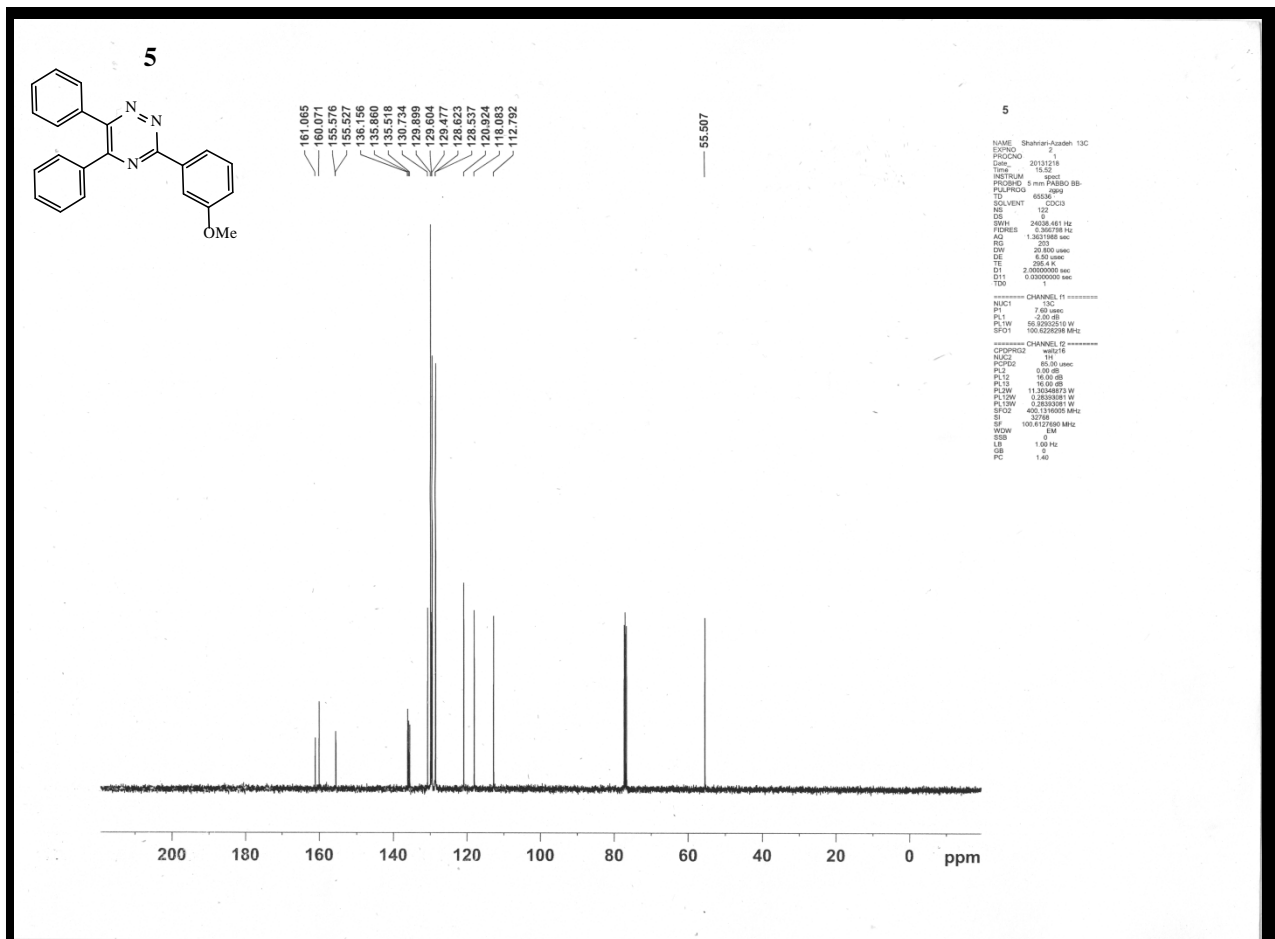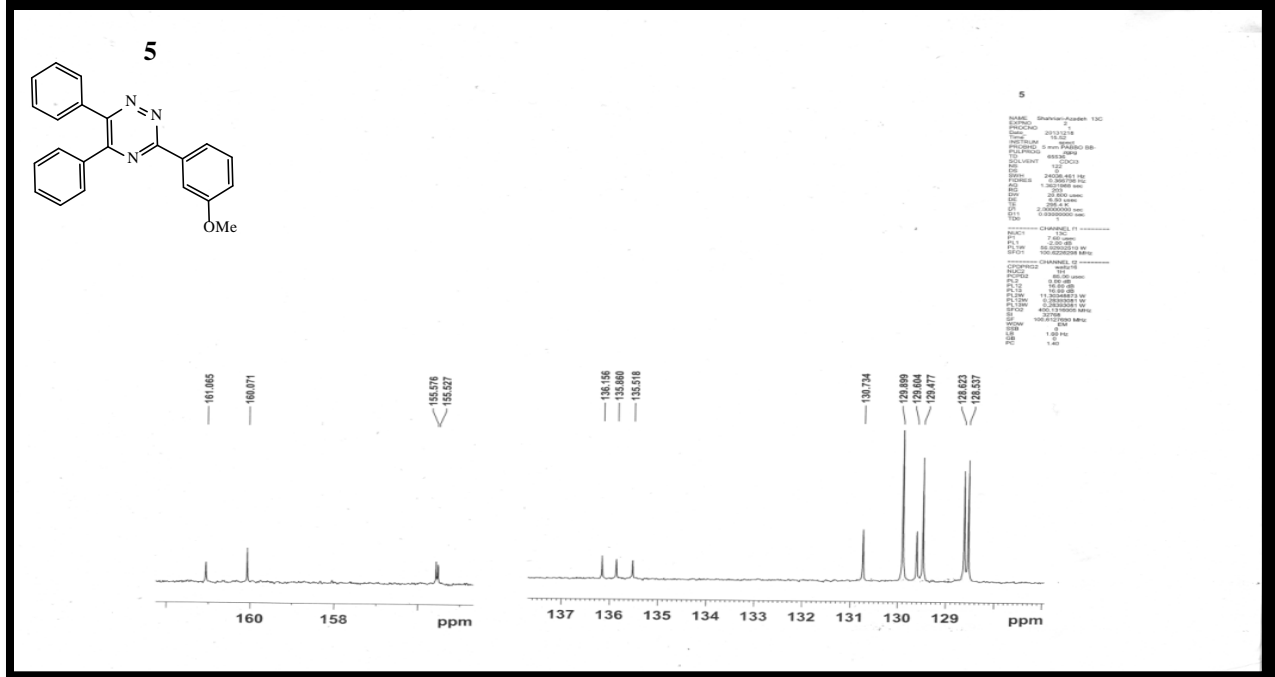

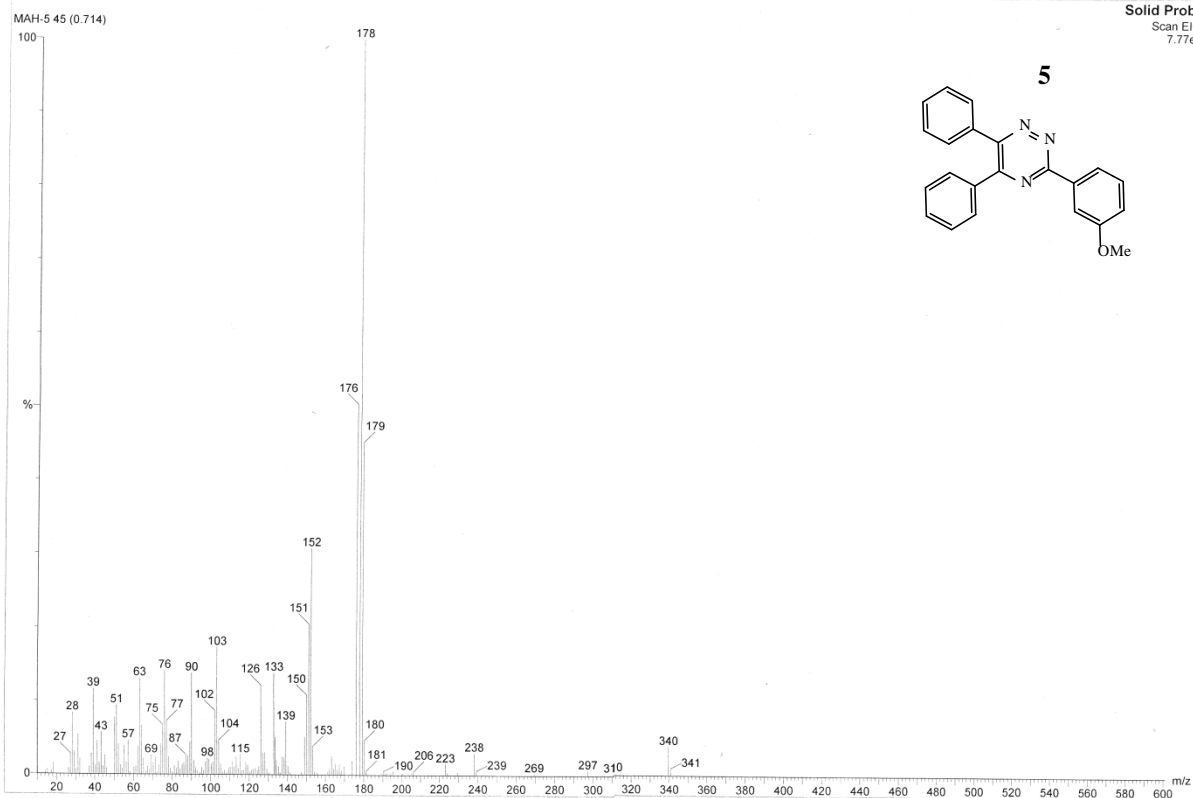

FILL TIME 10 SECONDS

DATE 20 12 91 TIME 16 55 40 OPERATOR ID GHAEMI

RUN 64 ID SHN5 WEIGHT 2.801

SIGNALS

ZR 1721  
NR 3796  
CR 35510  
HR 40826

CARBON 78.55%  
HYDROGEN 5.18%  
NITROGEN 12.54%

BLANKS 62 186 284  
KFACTORS 14.387 35.385 5.099

OXFILL COMB BOOST1 BOOST2

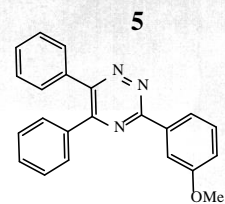

**6. 5,6-Bis(4-methoxyphenyl)-3-methyl-1,2,4-triazine (Table 2, entry 6):** Yellow powder. Mp: 122-125 °C (109-113 °C)<sup>29</sup>; IR (KBr): 2932, 2838, 1607, 1577, 1255, 832; <sup>1</sup>H NMR (90 MHz, DMSO-d<sub>6</sub>): δH (ppm) 2.81 (s, CH<sub>3</sub>, 3H), 3.34 (s, OCH<sub>3</sub>, 6H), 6.936-7.450 (m, CH aromatic, 8H). MS: m/z 307.

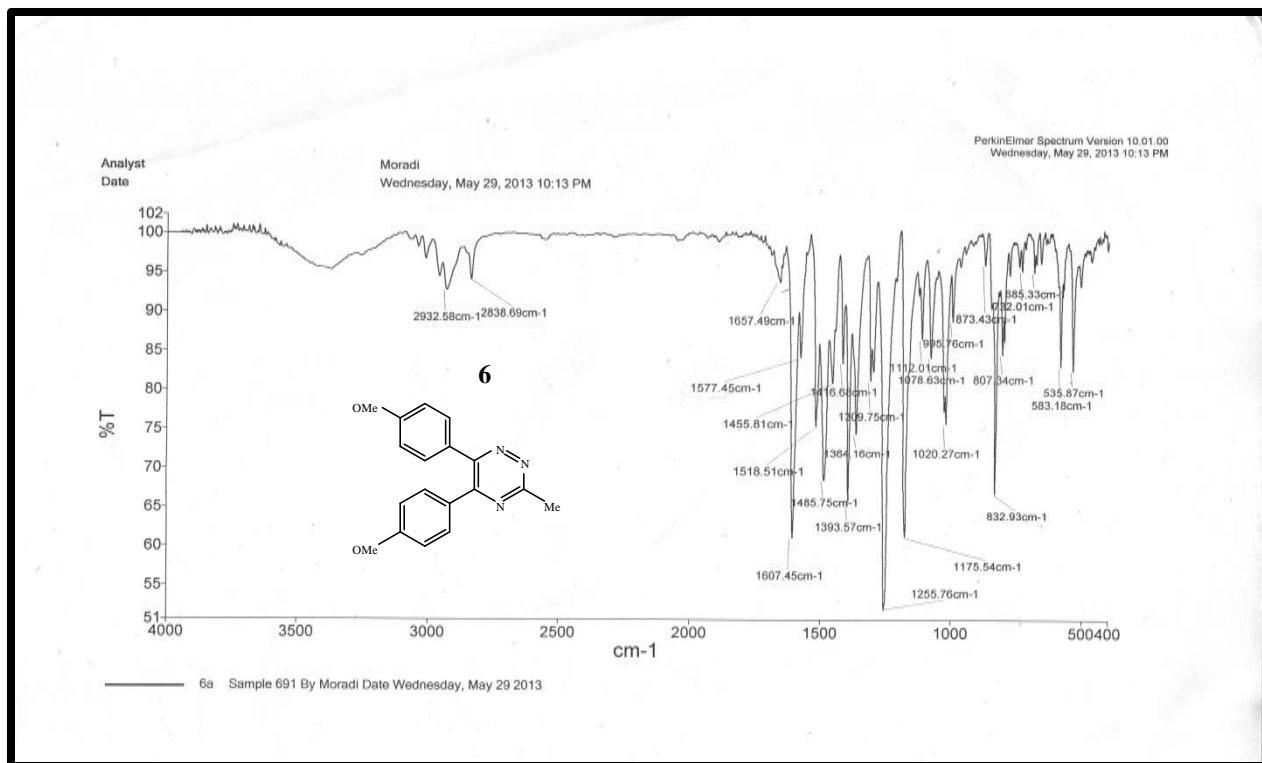



7. **3-Phenyl-5,6-di(*p*-tolyl)-1,2,4-triazine (Table 2, entry 7):** Yellow powder. Mp: 165-166 °C (168 °C)<sup>28</sup>; IR (KBr): 3062, 3032, 1608, 1490, 1366, 697; <sup>1</sup>H NMR (400 MHz, CDCl<sub>3</sub>): δ<sub>H</sub> (ppm) 2.42 (s, CH<sub>3</sub>, 3H), 2.42 (s, CH<sub>3</sub>, 3H), 7.19-8.69 (m, CH aromatic, 13H). <sup>13</sup>C NMR (100 MHz, CDCl<sub>3</sub>): δ<sub>c</sub> (ppm) 21.43, 21.52, 128.27, 128.78, 129.25, 129.30, 129.33, 129.80, 131.39, 132.83, 133.182, 134.96, 139.64, 141.14, 155.31, 155.38, 160.96. MS: *m/z* 337. Anal. Calcd for C<sub>23</sub>H<sub>19</sub>N<sub>3</sub>: C, 81.87; H, 5.68; N, 12.45 Found: C, 83.07; H, 5.78; N, 12.44.

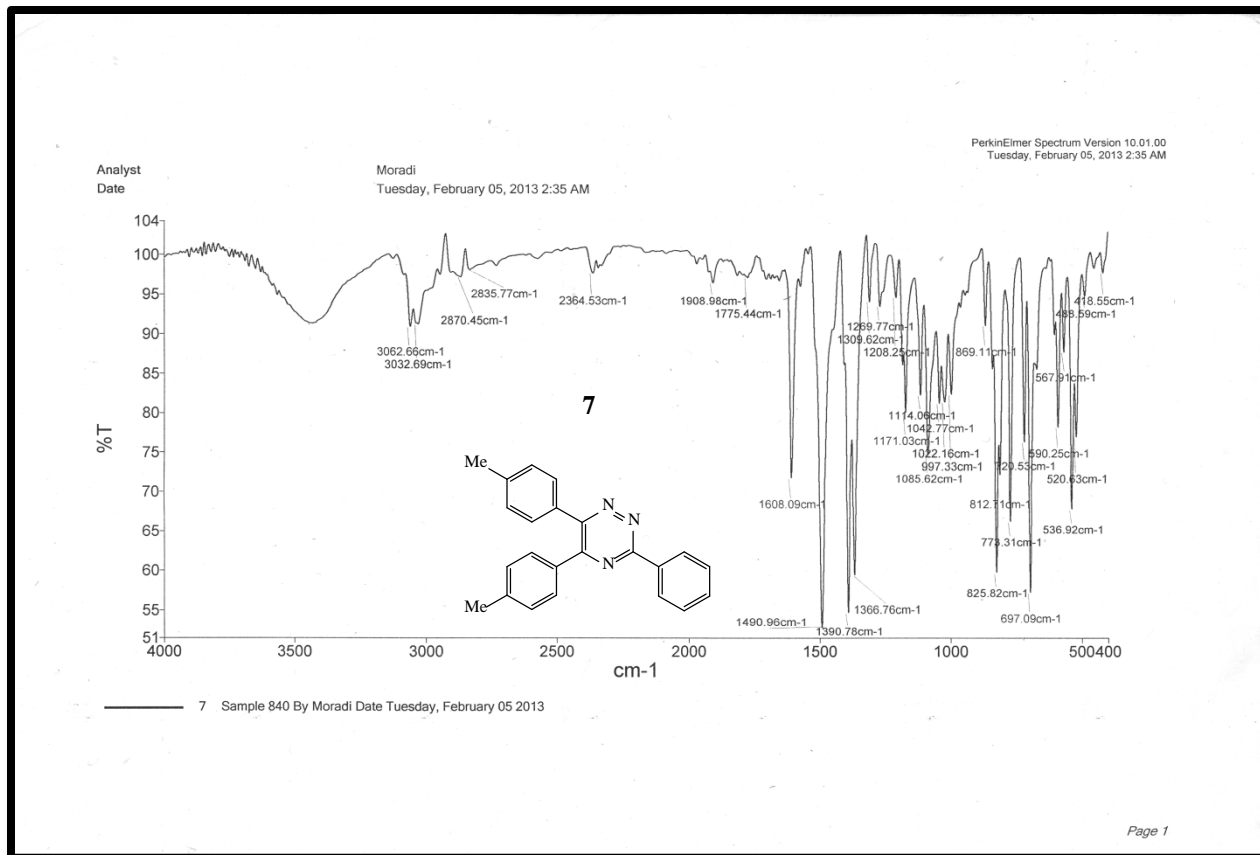

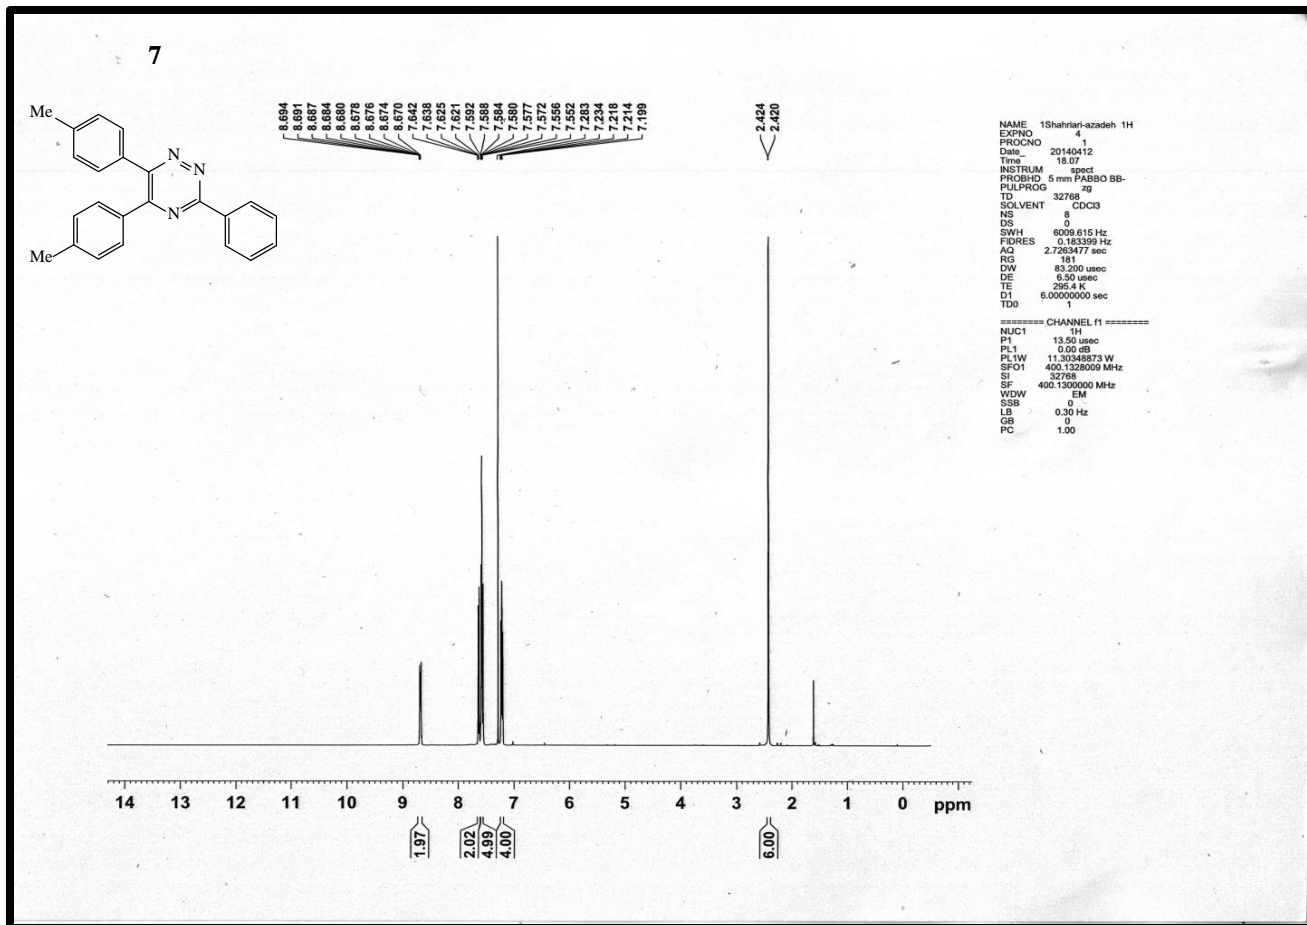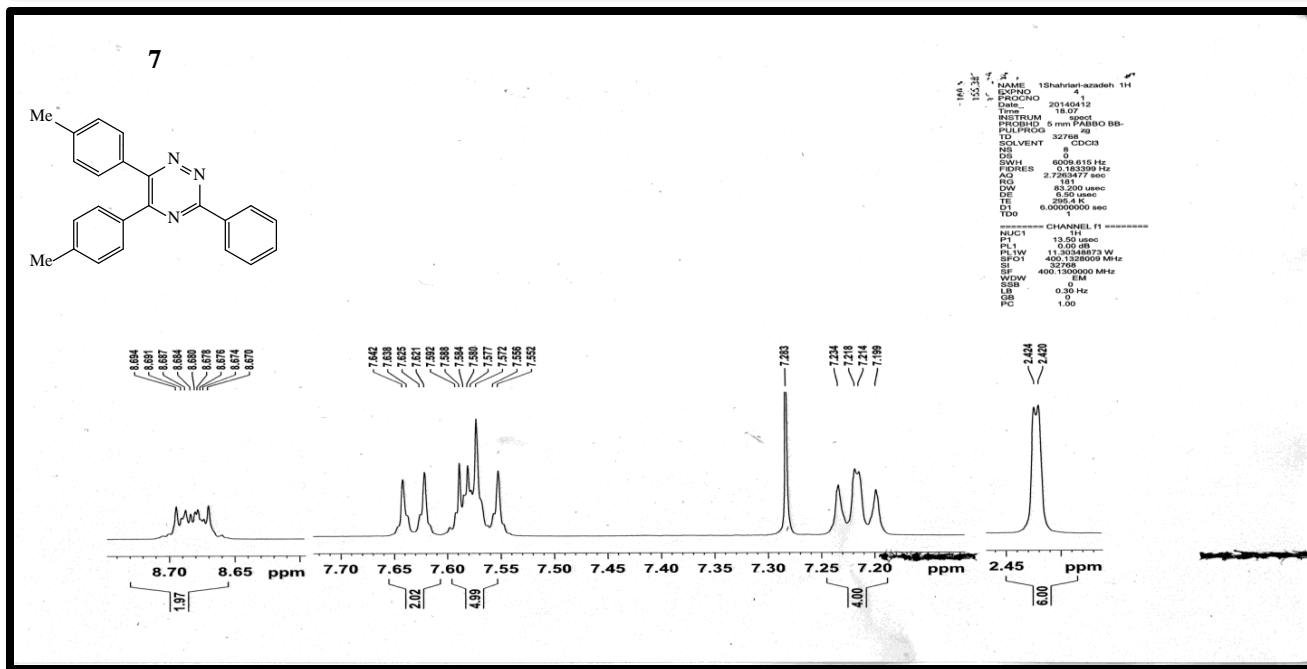



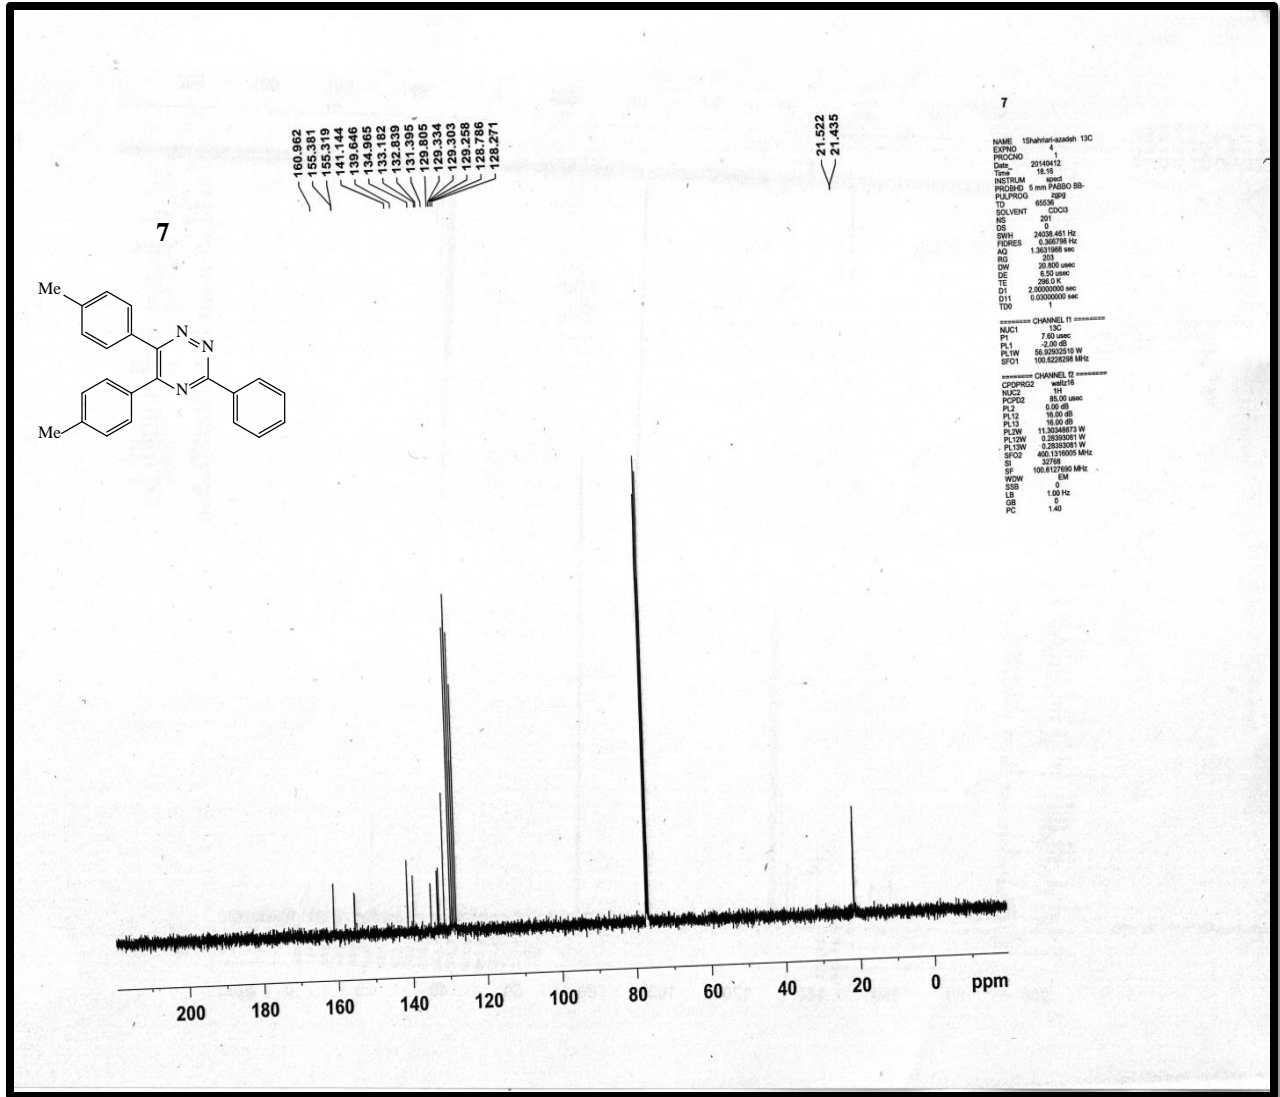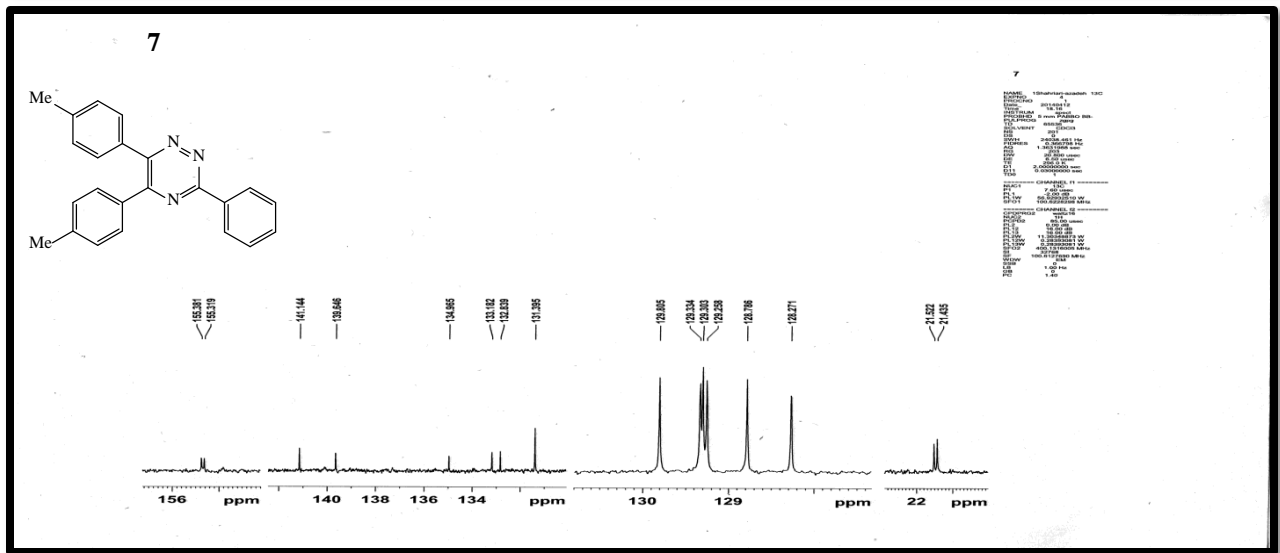

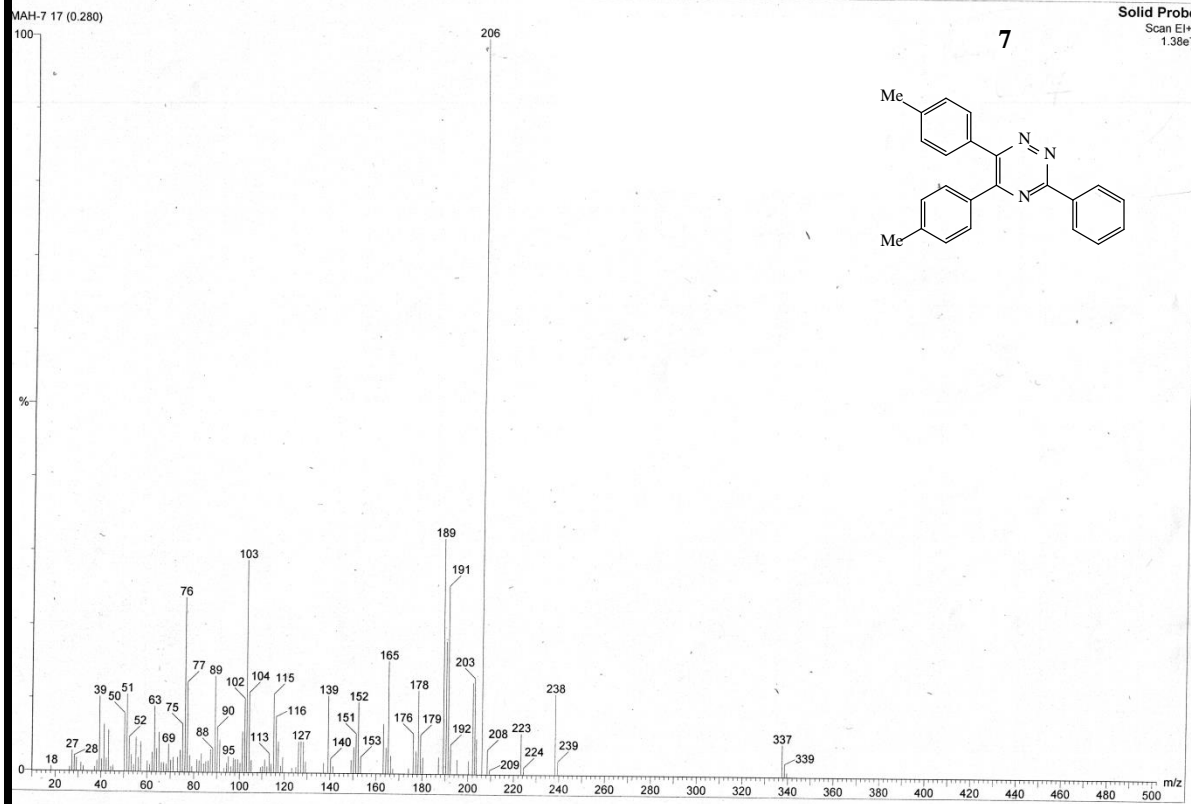

7

OXFILL COMB BOOST1 BOOST2  
0 0 0

FILL TIME 11 SECONDS

DATE 20 12 91 TIME 14 07 49 OPERATOR ID GHAEMI

RUN 27 ID SH7 WEIGHT 2.090

SIGNALS

ZR 1654  
NR 3271  
CR 27609  
HR 32040

CARBON 83.07%  
HYDROGEN 5.78%  
NITROGEN 12.44%

BLANKS 32 201 314  
KFACTORS 13.971 35.007 5.013

OXFILL COMB BOOST1 BOOST2  
0 0 0

FILL TIME 10 SECONDS

Chemical structure of 7: Cc1ccc(cc1)/C(=N2C(=N3C=CC=C3N2)c4ccc(C)cc4)c5ccc(C)cc5

8. **5,6-Dimethyl-3-(pyridin-4-yl)-1,2,4-triazine (Table 2, entry 8)**: Yellowish powder. Mp: 119-121 °C; IR (KBr): 2957, 2925, 2855, 1597, 1518, 1397, 1384, 783; <sup>1</sup>H NMR (400 MHz, DMSO-d<sub>6</sub>): δ<sub>H</sub> (ppm) 2.61 (s, CH<sub>3</sub>, 3H), 2.68 (s, CH<sub>3</sub>, 3H), 8.26-8.80 (m, CH aromatic, 4H). <sup>13</sup>C NMR (100 MHz, DMSO-d<sub>6</sub>): δ<sub>c</sub> (ppm) 19.76, 22.24, 121.60, 142.68, 151.12, 158.50, 159.80, 160.686. MS: *m/z* 186.

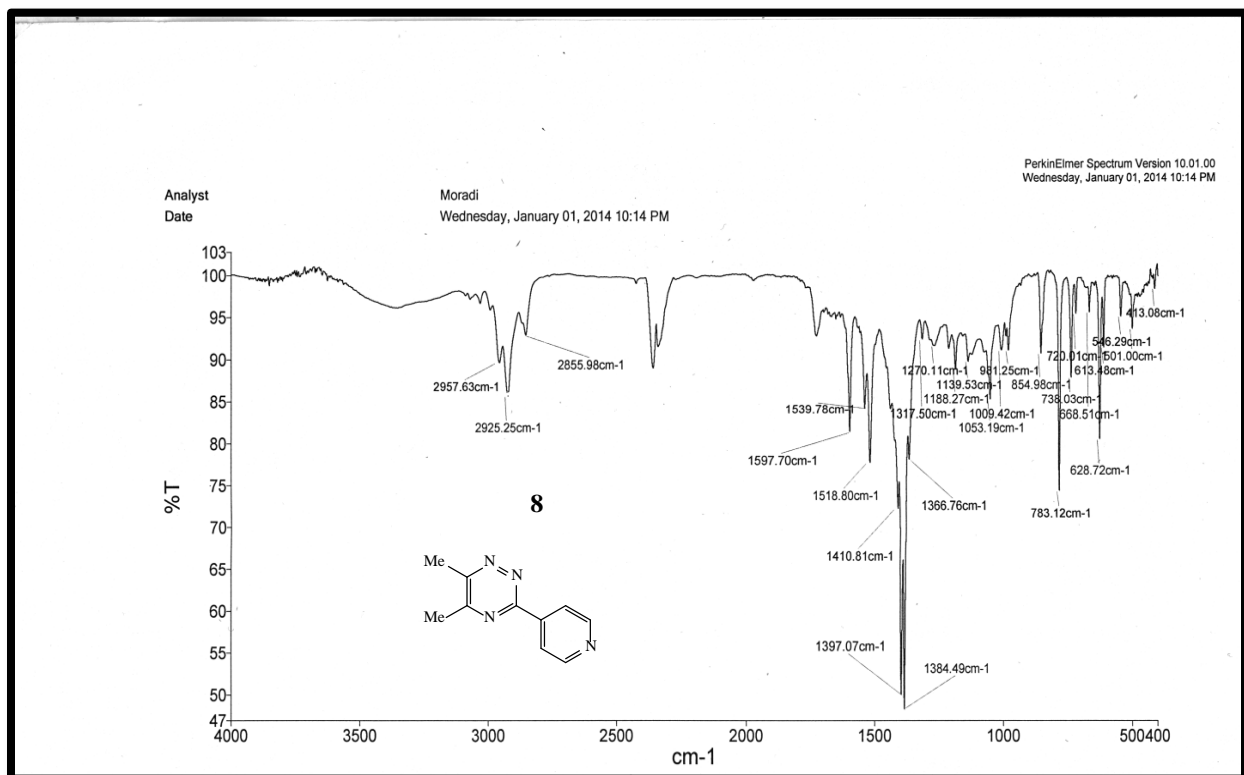

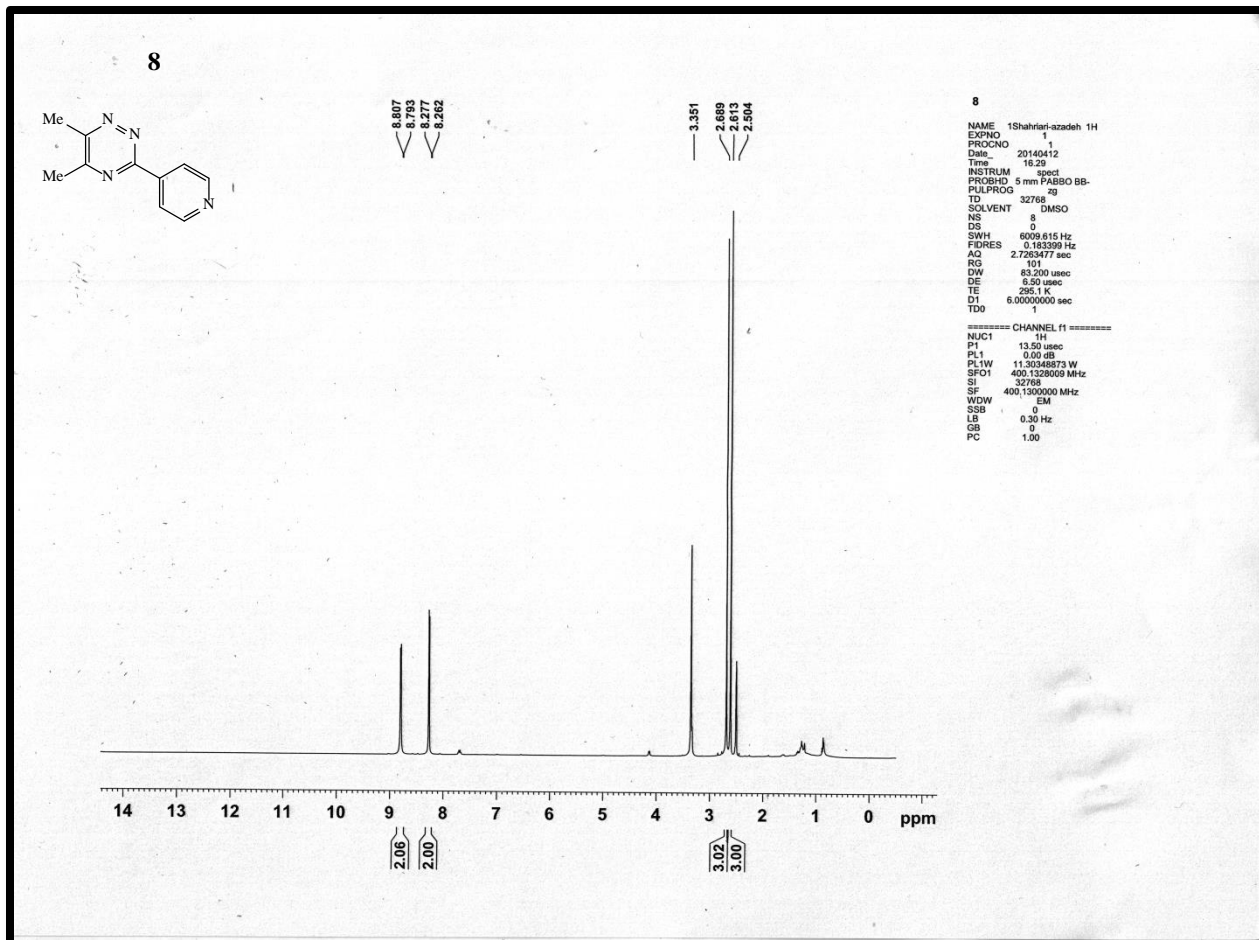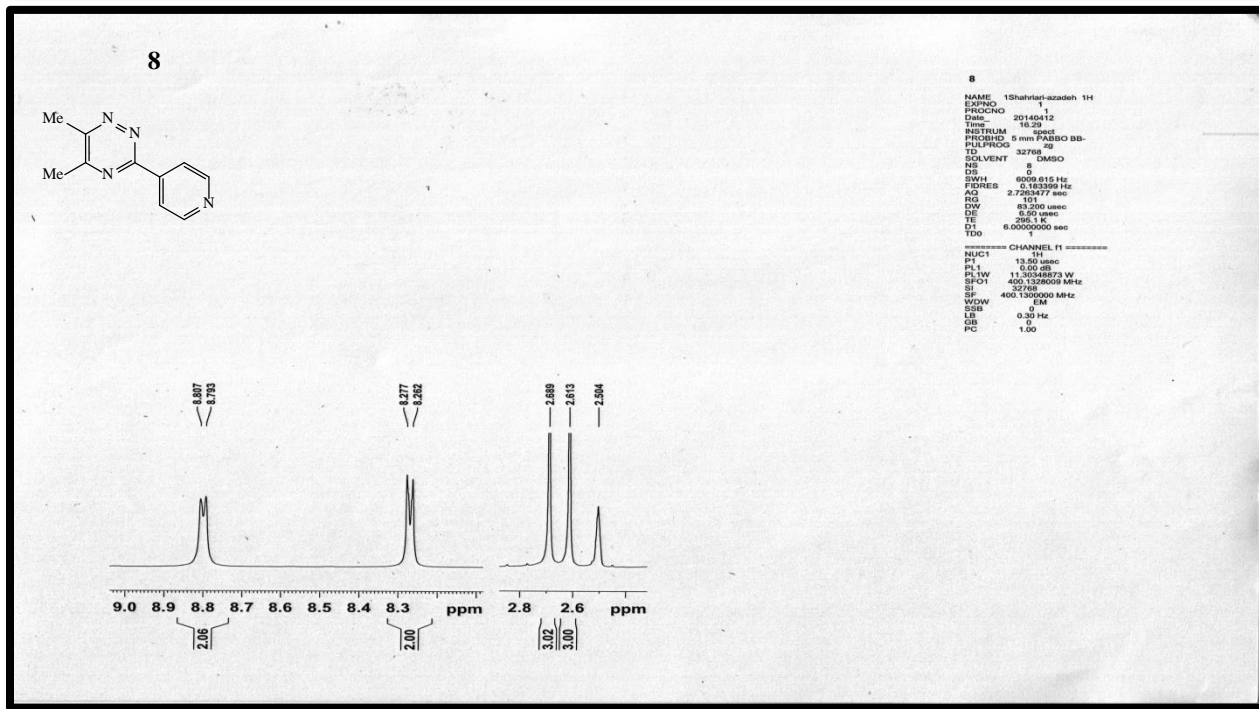

8

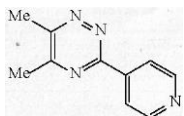

gg N  
1/1

ME

;

```
NAME 15uhvst-ssash 13C
EXPNO 1
PROCNO 1
PROC 2016412
Date_ 16-1
Time 16:41
INSTRUM spect
PROBHD 5 mm PABBO BB-
PULPROG zgpg30
TD 65536
SOLVENT DMSO
SI 512
SF 240.615 MHz
F2 50.615 MHz
AQ 1.307188 sec
RG 384
SFO 120.150 MHz
DS 4.00 um
TE 303.2 K
D1 3.000000 sec
DEL 0.000000 sec
TD0
```

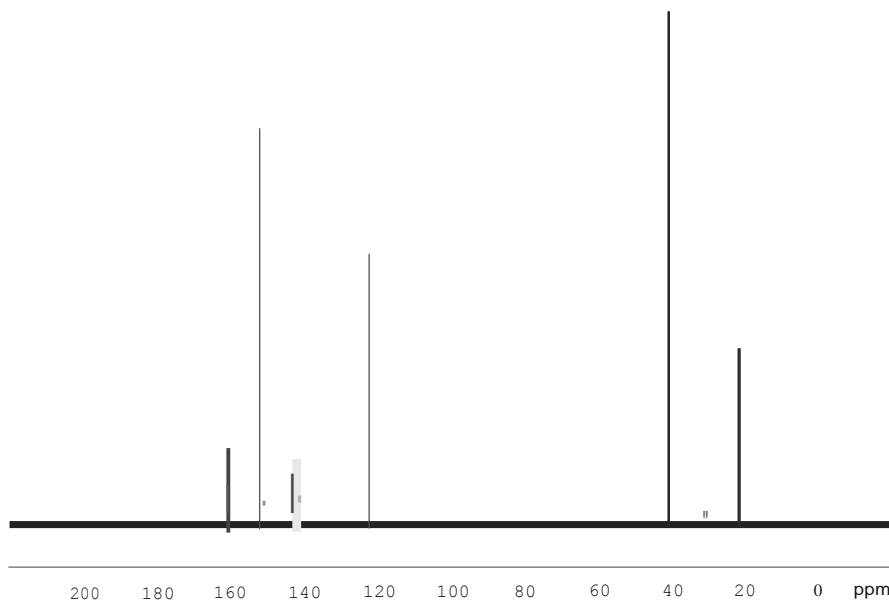

MAH-8 17 (0.280)

Solid Probe  
Scan E1+  
3.18e6

8

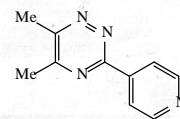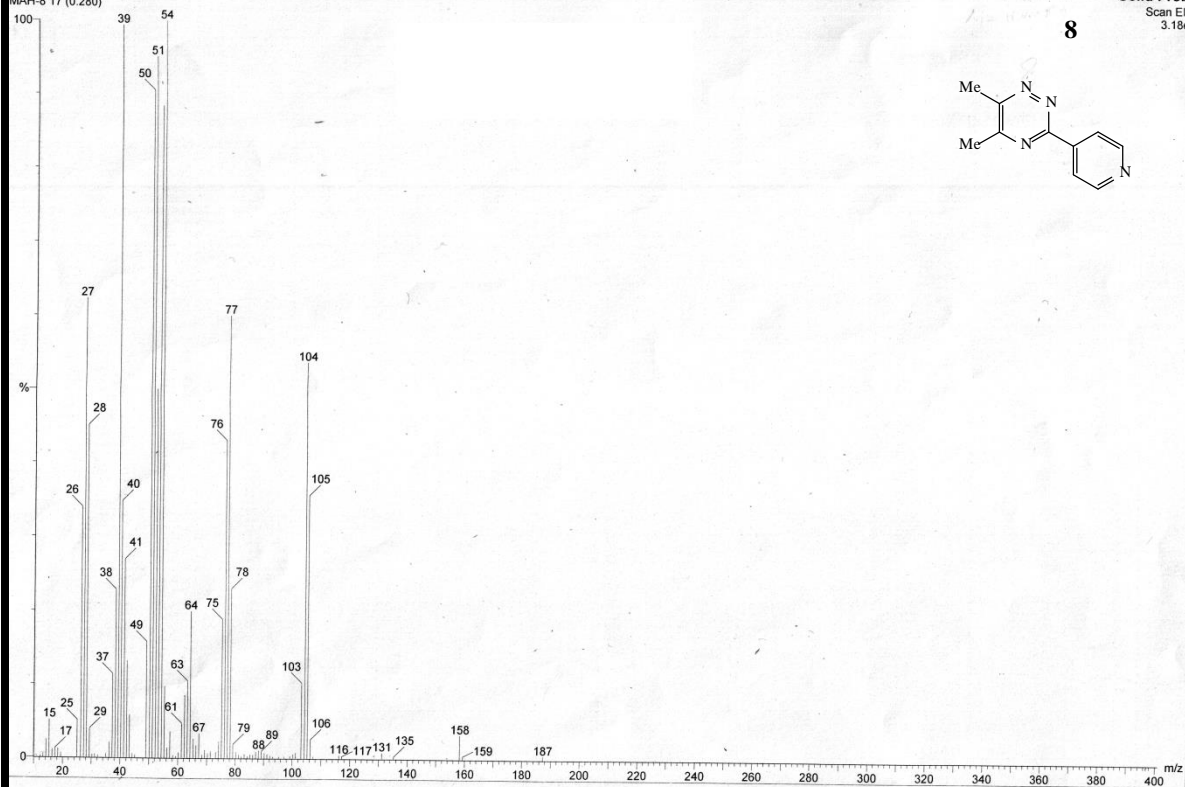

9. **5,6-Diphenyl-3-(pyridin-4-yl)-1,2,4-triazine (Table 2, entry 9):** Yellow powder. Mp: 163-164 °C; <sup>1</sup>H NMR (400 MHz CDCl<sub>3</sub>): δ<sub>H</sub> (ppm) 7.28-8.87 (m, CH aromatic, 14H). <sup>13</sup>C NMR (100 MHz, CDCl<sub>3</sub>): δ<sub>c</sub> (ppm) 121.87, 128.68, 128.75, 129.52, 129.87, 130.02, 131.11, 135.07, 135.32, 142.19, 150.76, 155.95, 156.74, 159.64. MS: *m/z* 310. Anal. Calcd for C<sub>20</sub>H<sub>14</sub>N<sub>4</sub>: C, 77.40; H, 4.55; N, 18.05 Found: C, 77.48; H, 4.33; N, 17.71.

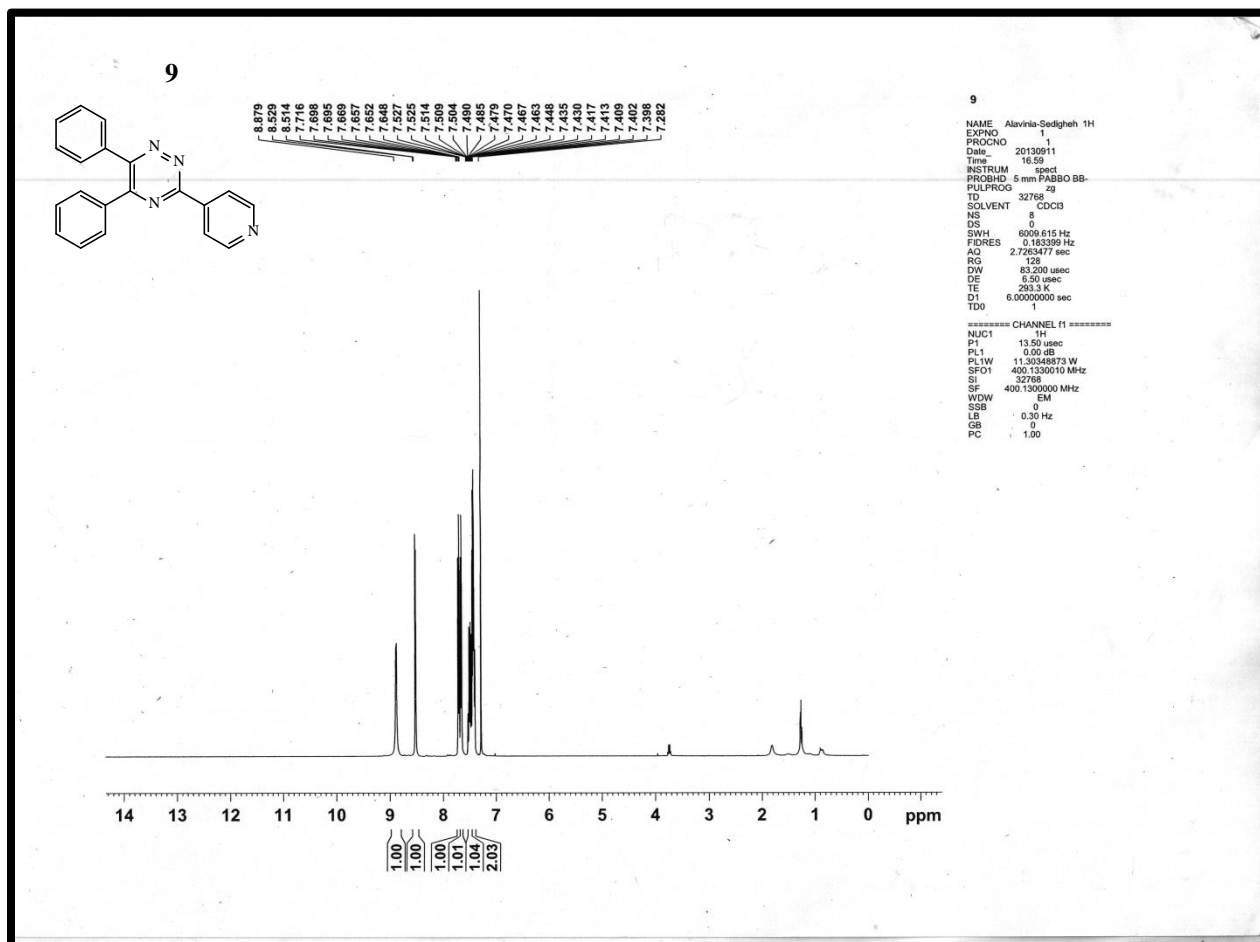





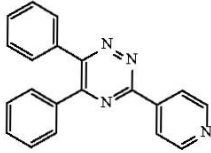

J:\i<IU1:J Ii:\$.11-M t.:nromatogram t.:#A:S I:IBntyYVUKK1\Uata(:Snanryan II Uli\_1U\_<IU1:J\_1U\_II\_U1:J\_Y\_UU\_4f 1-M\_U :11-KM

Page : / of

Result Table (ESTD- Shshrysri 9 09\_10\_2013\_10\_9\_2013 9\_00\_47 PM\_052 - INT7- 1)

|   | Reten. Time [min] | Response  | Weight [mg] | Weight [%] | Peak Type | Element Name | Carbon Response Ratio |
|---|-------------------|-----------|-------------|------------|-----------|--------------|-----------------------|
|   | 0.960             | 2662.419  | 1.049       | 17.71      | Refer     | Nitrogen     | 0.113                 |
|   | 1.363             | 23614.050 | 4.588       | 77.48      | Refer     | Carbon       | 1.000                 |
| 3 | 5.537             | 5885.472  | 0.256       | 4.33       | Refer     | Hydrogen     | 0.249                 |
|   | Total             |           | 5.922       | 99.52      |           |              |                       |

10. **5,6-Bis(4-methoxyphenyl)-3-(pyridin-4-yl)-1,2,4-triazine (Table 2, entry 10)**: Yellow powder. Mp: 155-157 °C; IR (KBr): 3071, 3034, 2936, 2839, 1603, 1576, 1485, 1257, 828; <sup>1</sup>H NMR (400 MHz, DMSO-d<sub>6</sub>): δH (ppm) 3.80 (s, OCH<sub>3</sub>, 3H), 3.81 (s, OCH<sub>3</sub>, 3H), 6.98-8.86 (m, CH aromatic, 12CH). <sup>13</sup>C NMR (100 MHz, DMSO-d<sub>6</sub>): δc (ppm) 55.74, 55.87, 114.54, 114.62, 121.84, 127.75, 128.05, 131.19, 132.00, 142.46, 151.21, 155.37, 156.47, 158.91, 160.92, 161.99. MS: m/z 370.

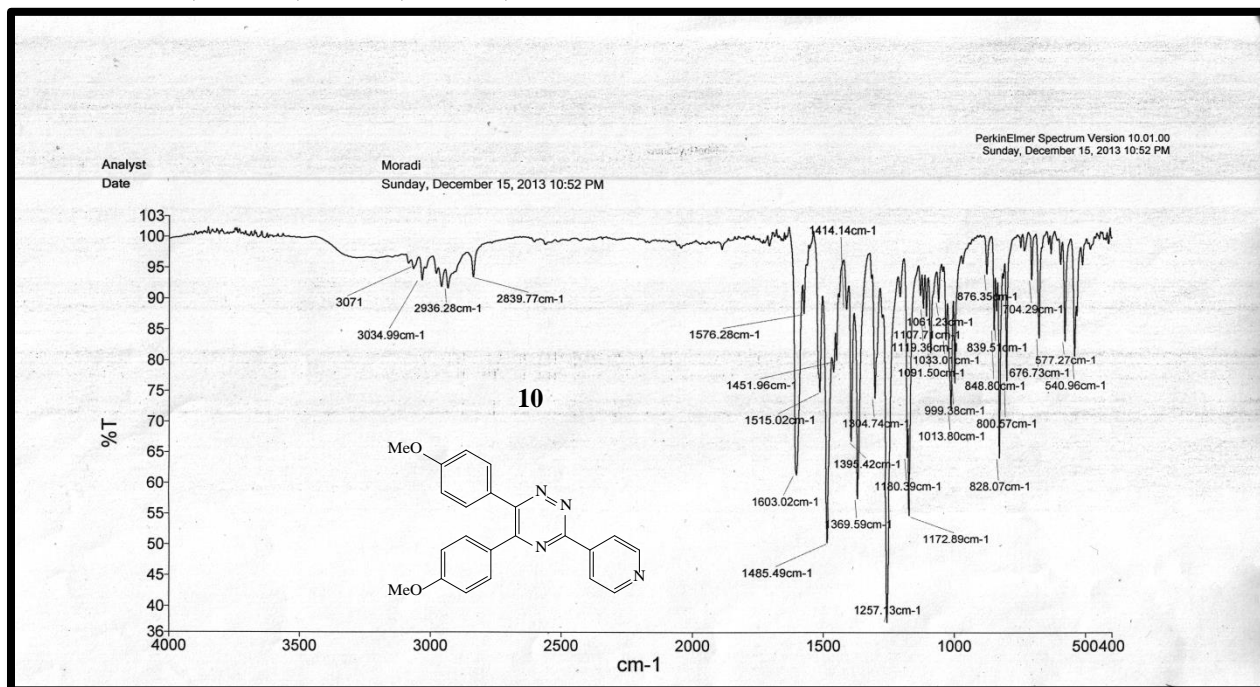

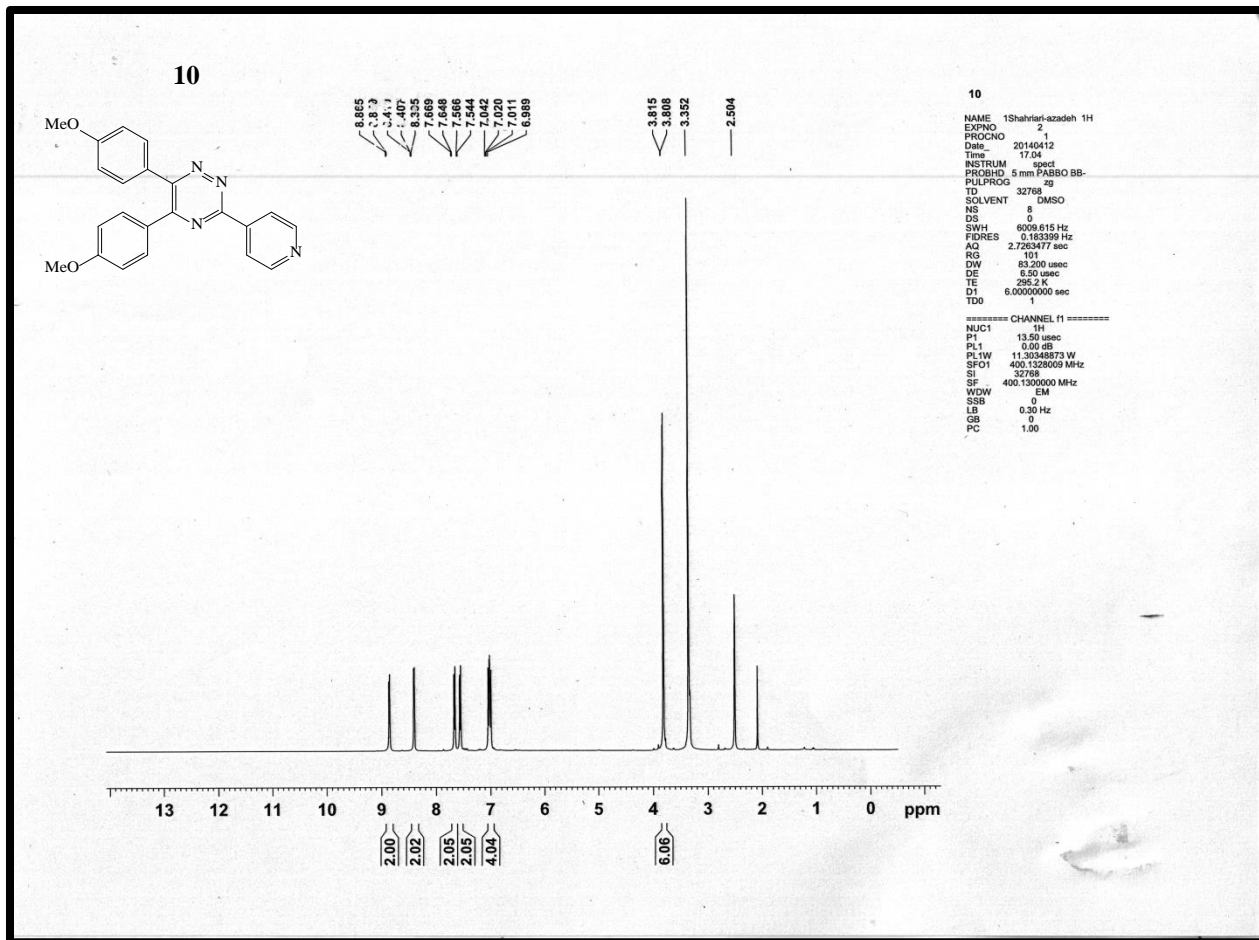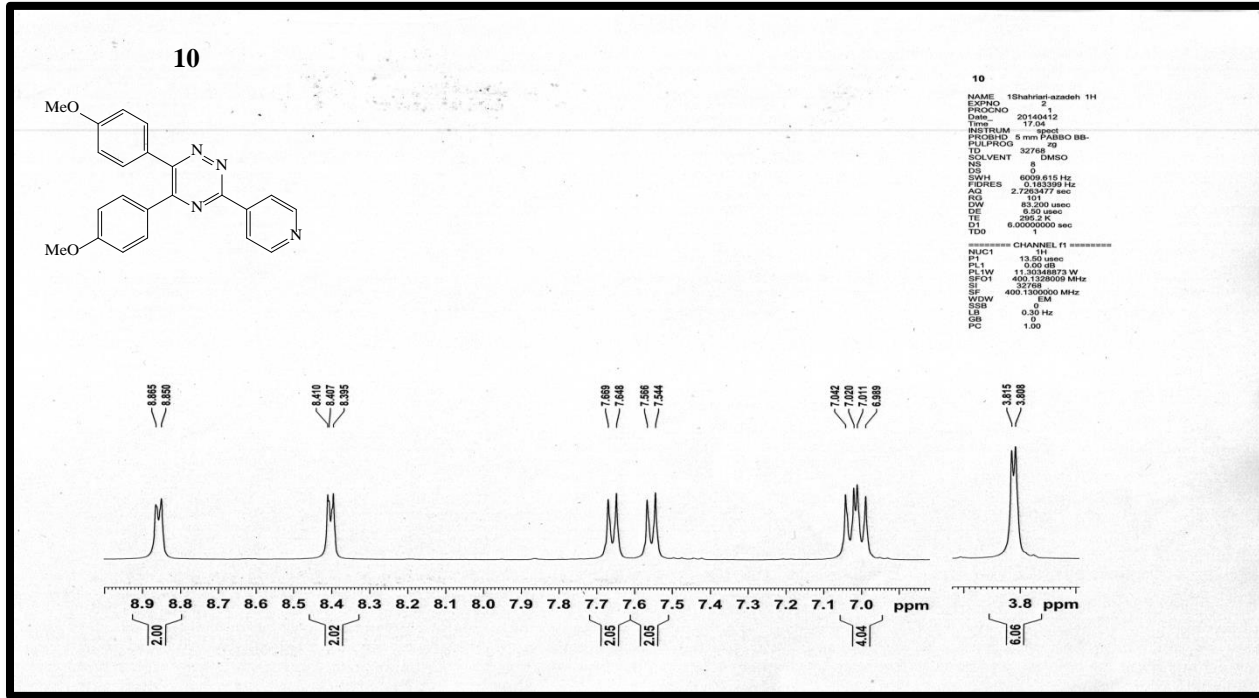



10

File : C:\MSDCHEM\4\DATA\SNAPSHOT\64013057.D  
Operator :  
Acquired : 4 Jan 2014 8:46 using AcqMethod TEST ARI  
Instrument : Instrumen  
Sample Name: 10  
Misc Info :  
Vial Number: 1

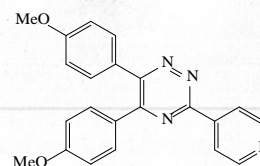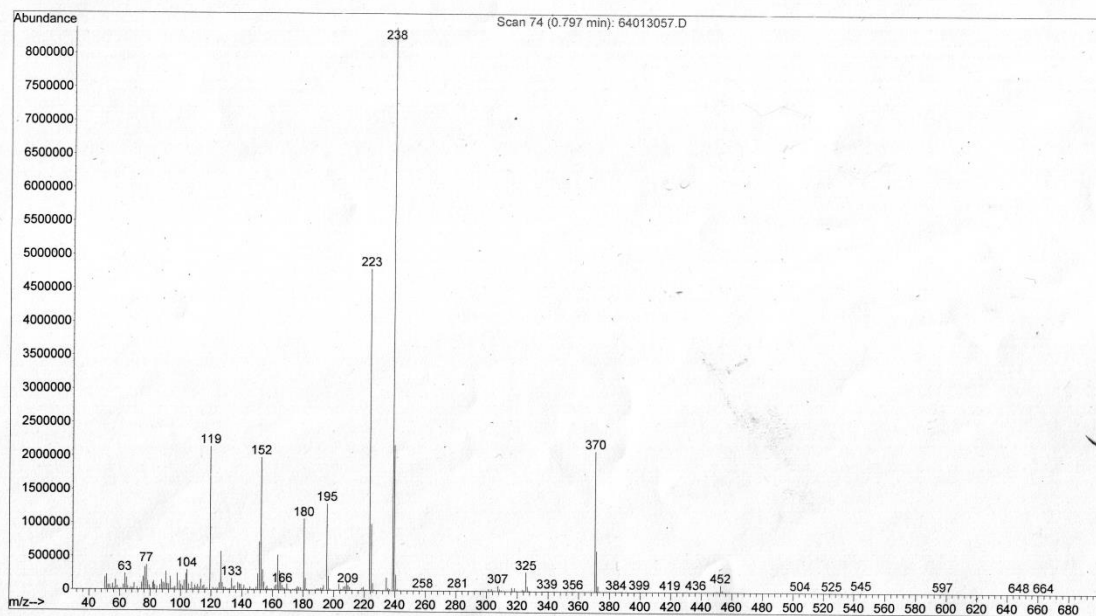

11. **3,5,6-Tri(*p*-tolyl)-1,2,4-triazine (Table 2, entry 11):** Yellow powder. Mp: 166-167 °C (165 °C)<sup>28</sup>; IR (KBr): 3031, 2918, 2863, 1610, 1490, 819.55; <sup>1</sup>H NMR (400 MHz CDCl<sub>3</sub>): δ<sub>H</sub> (ppm) 2.41 (s, CH<sub>3</sub>, 3H), 2.41 (s, CH<sub>3</sub>, 3H), 2.48 (s, CH<sub>3</sub>, 3H), 7.19-8.58 (m, CH aromatic, 12H). <sup>13</sup>C NMR (100 MHz, CDCl<sub>3</sub>): δ<sub>c</sub> (ppm) 21.43, 21.52, 21.64, 128.23, 129.23, 129.28, 129.30, 129.56, 129.79, 132.22, 132.93, 133.28, 139.52, 141.04, 141.79, 155.13, 155.24, 161.03. MS: *m/z* 351.

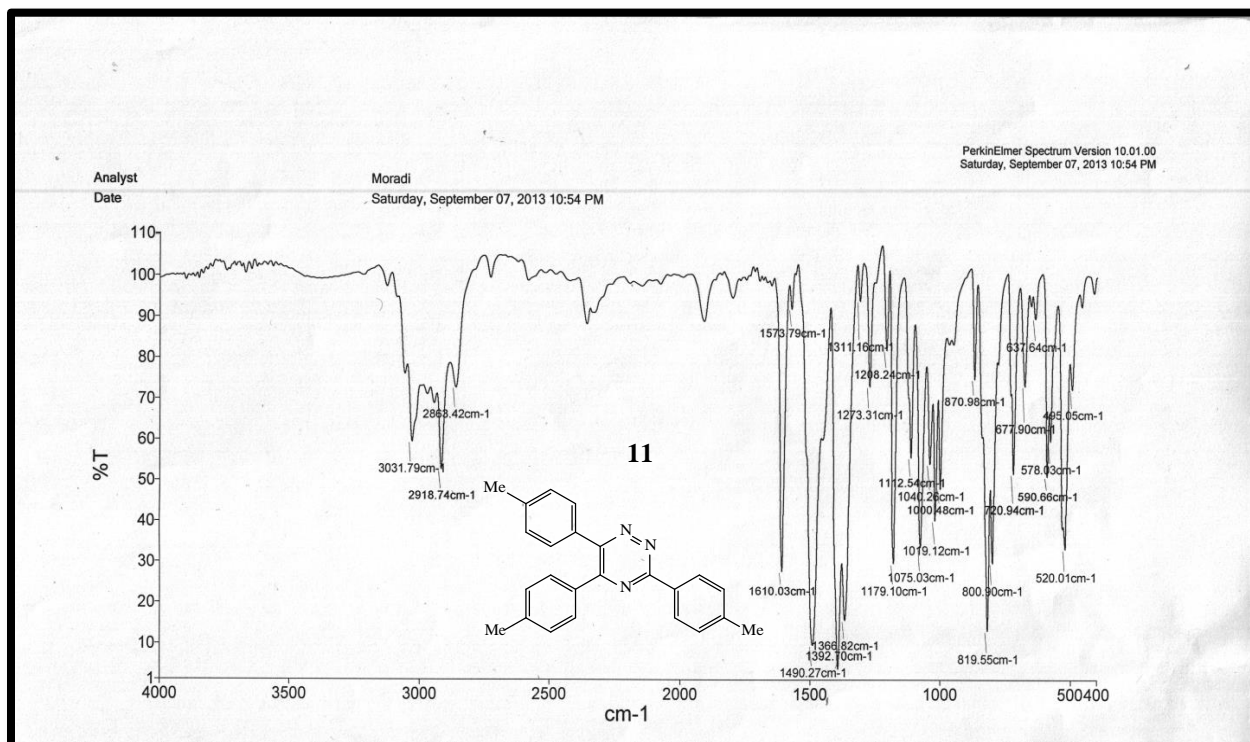

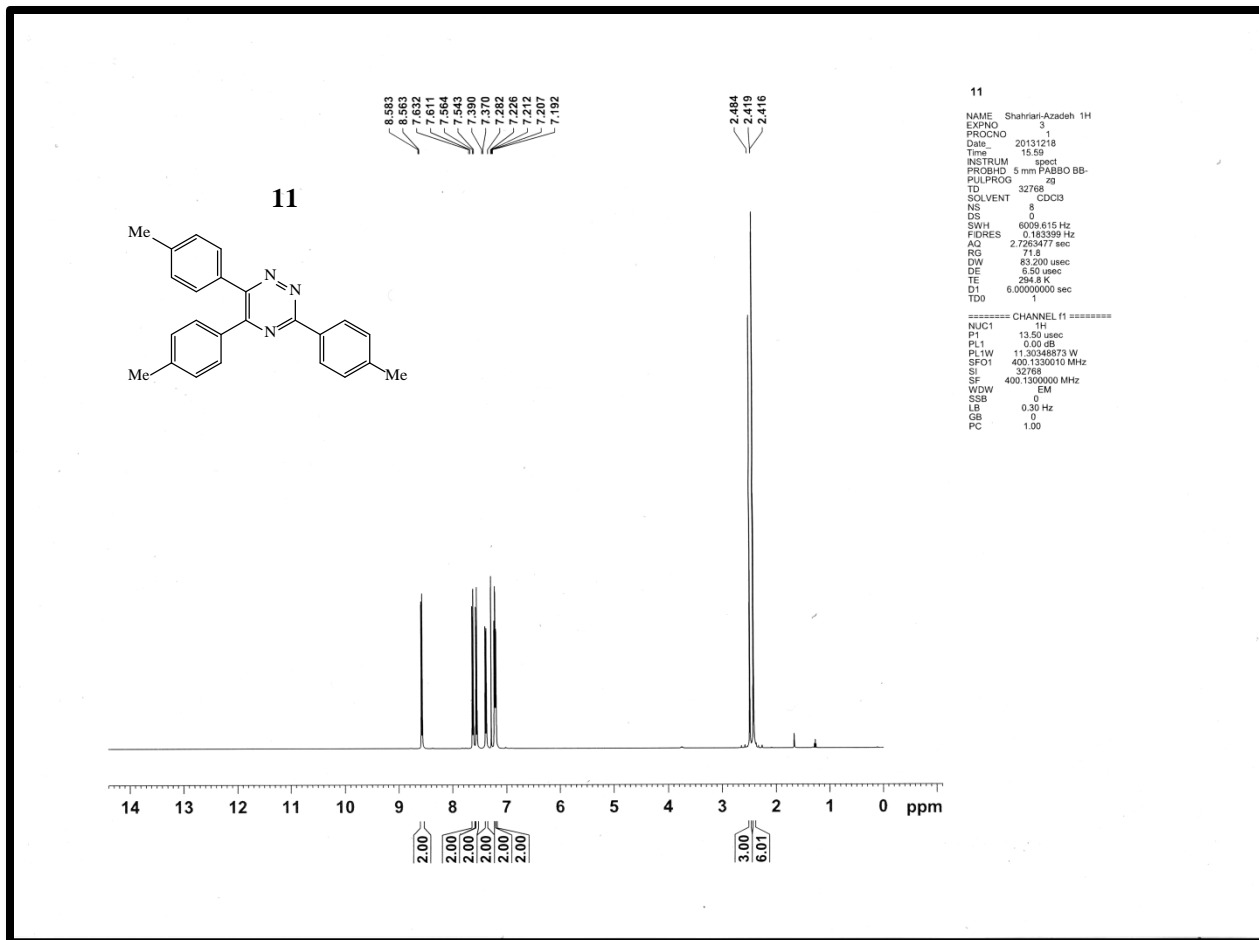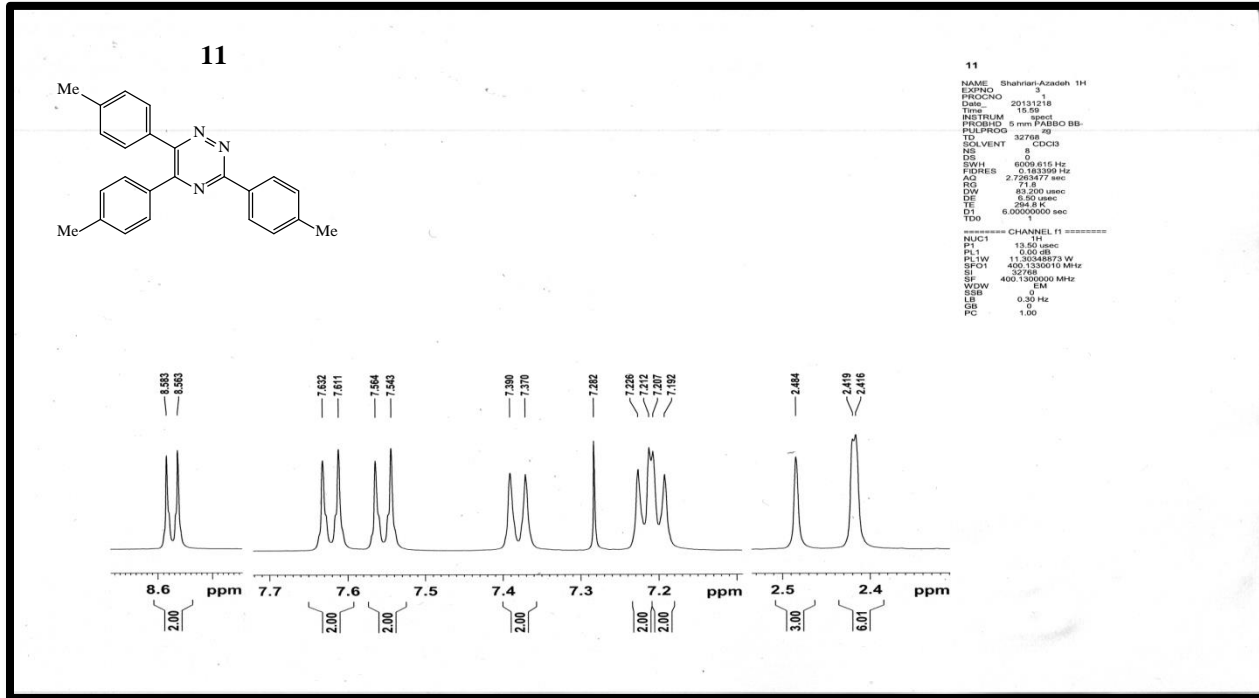





11

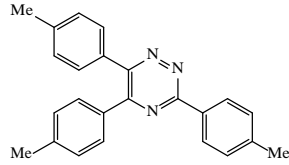

|   | Reten. Time [min] | Response  | Weight [mg] | Weight [%] | Peak Type | Element Name | Carbon Response Ratio |
|---|-------------------|-----------|-------------|------------|-----------|--------------|-----------------------|
|   | 0.980             | 1762.871  | 0.648       | 11.86      | Refer     | Nitrogen     | 0.076                 |
|   | 1.377             | 23166.181 | 4.466       | 81.74      | Refer     | Carbon       | 1.000                 |
| 3 | 5.833             | 7156.328  | 0.324       | 5.94       | Refer     | Hydrogen     | 0.309                 |
|   | Total             |           | 5.464       | 99.54      |           |              |                       |

File : C:\MSDCHEM\4\DATA\Snapshot\64013494.D  
 Operator :  
 Acquired : 4 Jan 1980 1:57 using AcqMethod TEST ARI  
 Instrument : Instrumen  
 Sample Name: 11  
 Misc Info :  
 Vial Number: 1

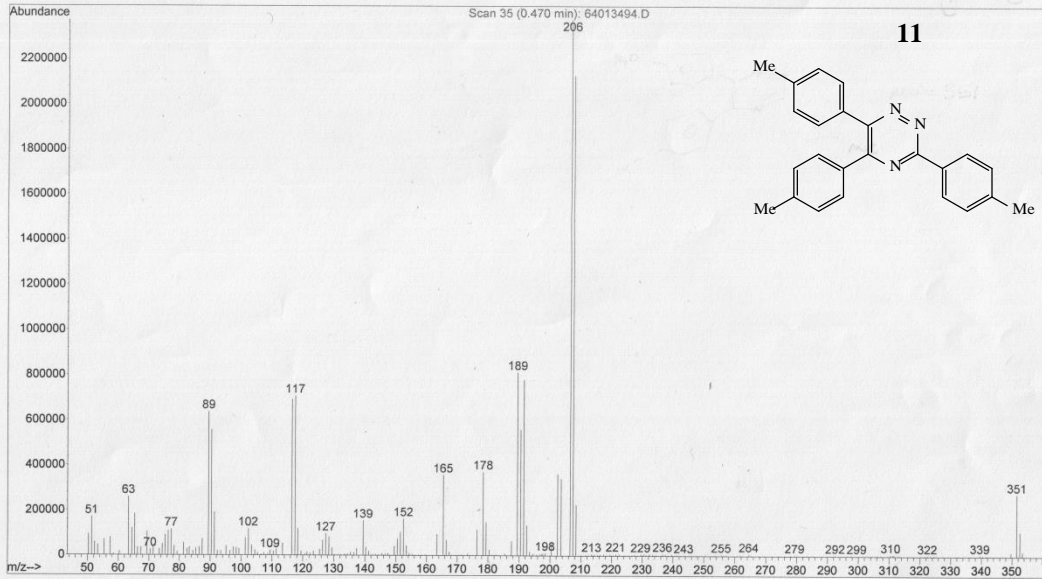

12. **3-(Pyridin-4-yl)-5,6-di(*p*-tolyl)-1,2,4-triazine (Table 2, entry 12):** Yellow powder. Mp: 145-147 °C; IR (KBr): 3066, 3031, 2979, 1608, 1492, 1390, 697; <sup>1</sup>H NMR (400 MHz CDCl<sub>3</sub>): δ<sub>H</sub> (ppm) 2.42 (s, CH<sub>3</sub>, 6H), 7.20-8.86 (m, CH aromatic, 12H). <sup>13</sup>C NMR (100 MHz, CDCl<sub>3</sub>): δ<sub>C</sub> (ppm) 21.46, 21.54, 121.81, 129.35, 129.39, 129.46, 129.80, 132.37, 132.61, 140.19, 141.65, 142.38, 150.69, 155.71, 156.55, 159.30. MS: *m/z* 338.

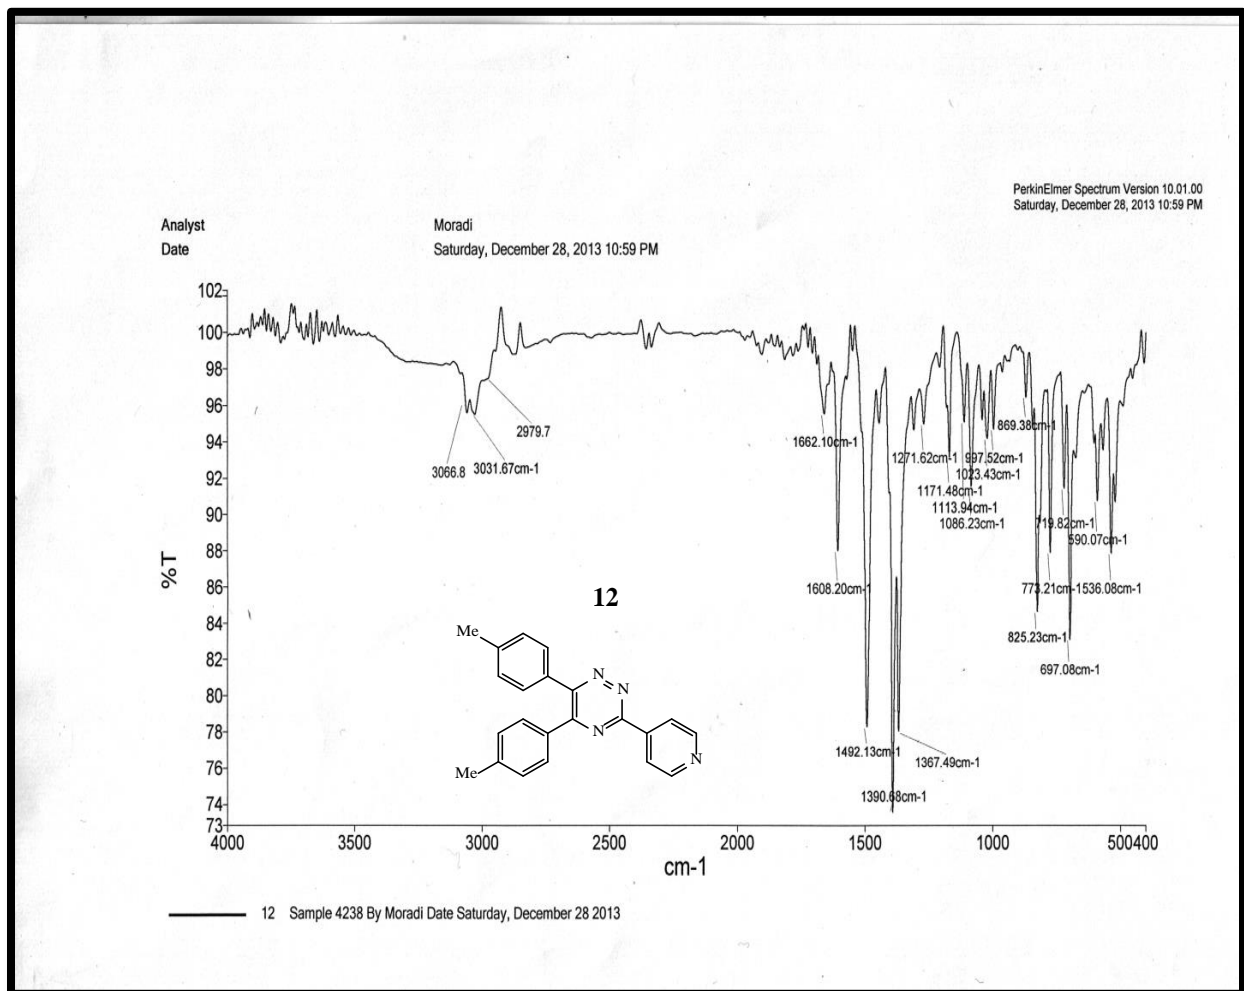

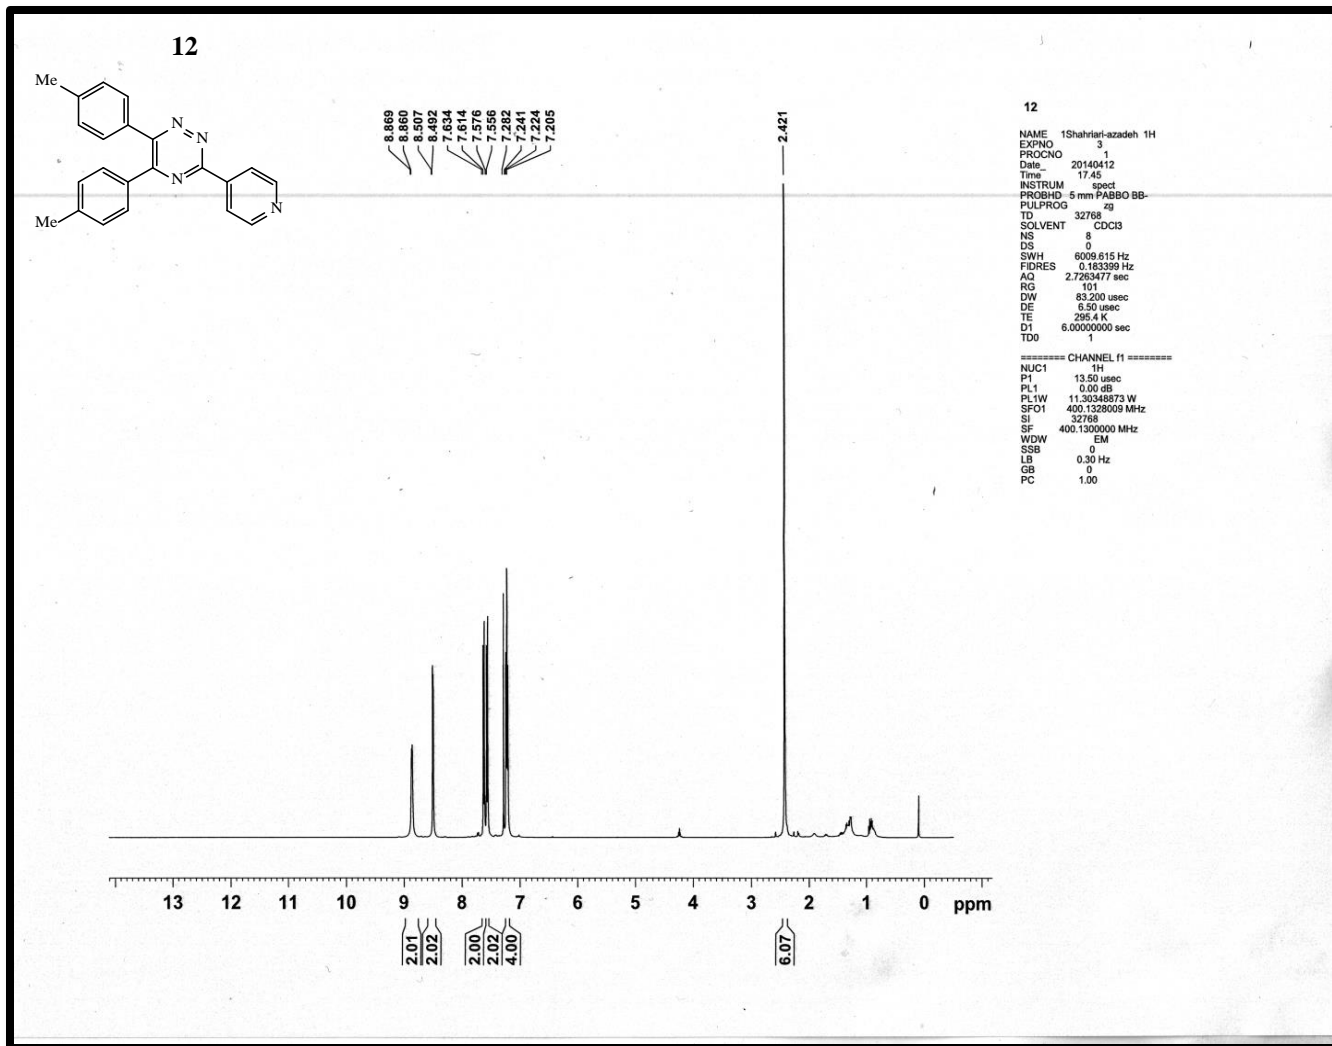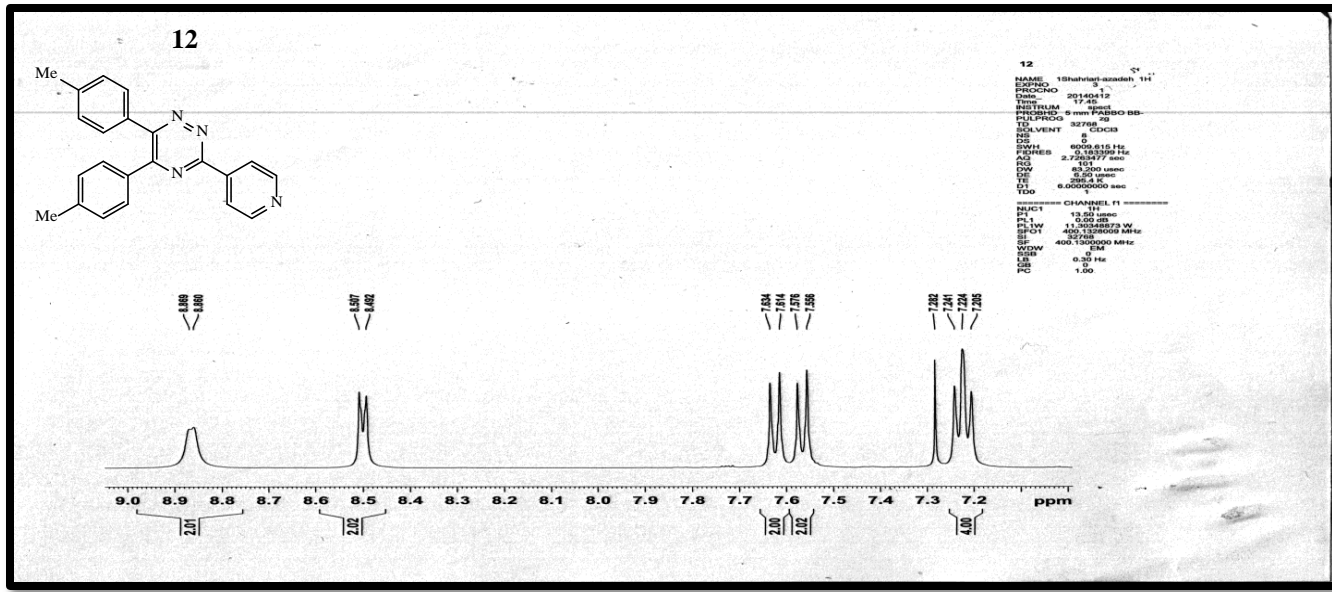

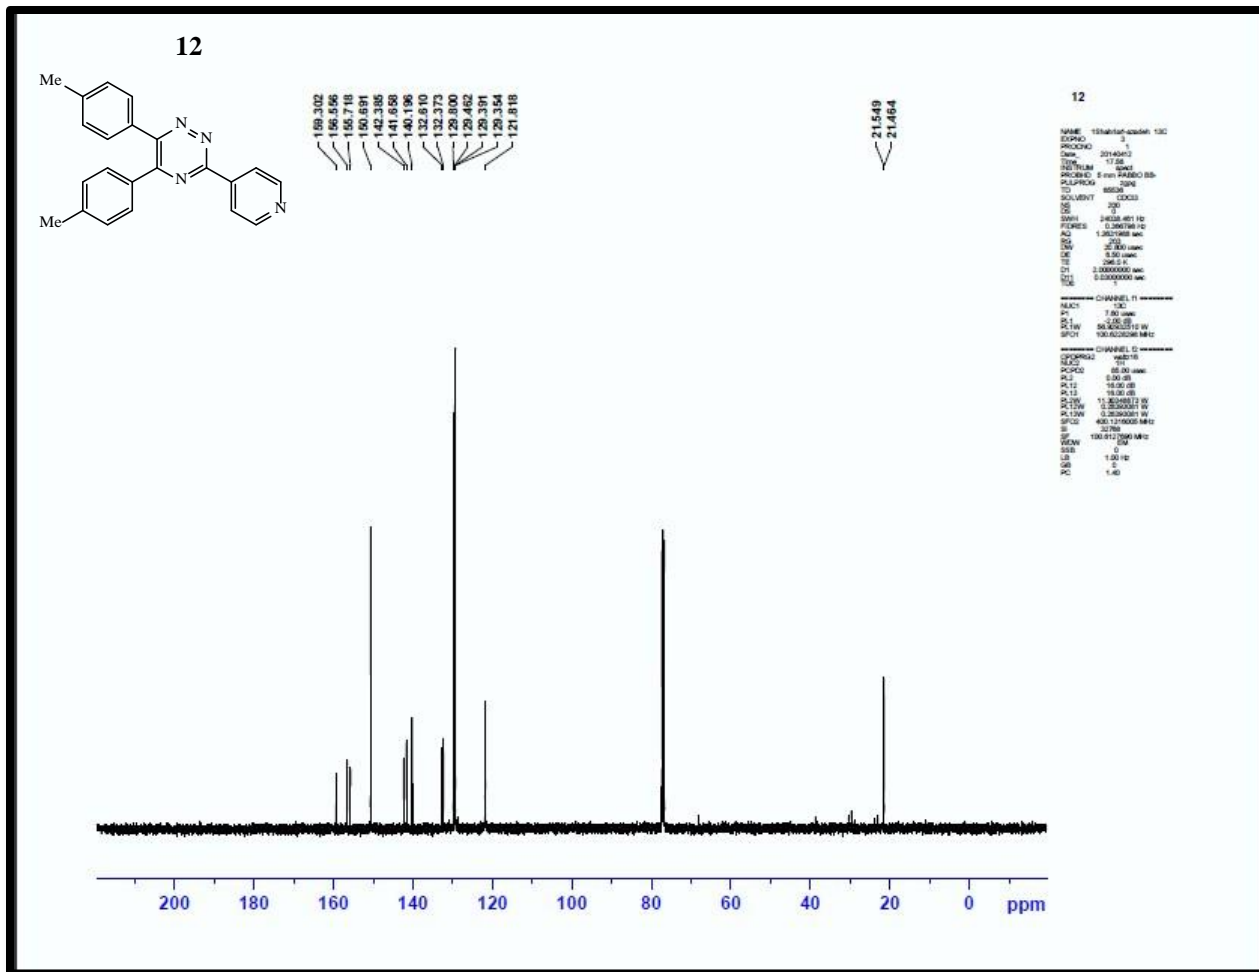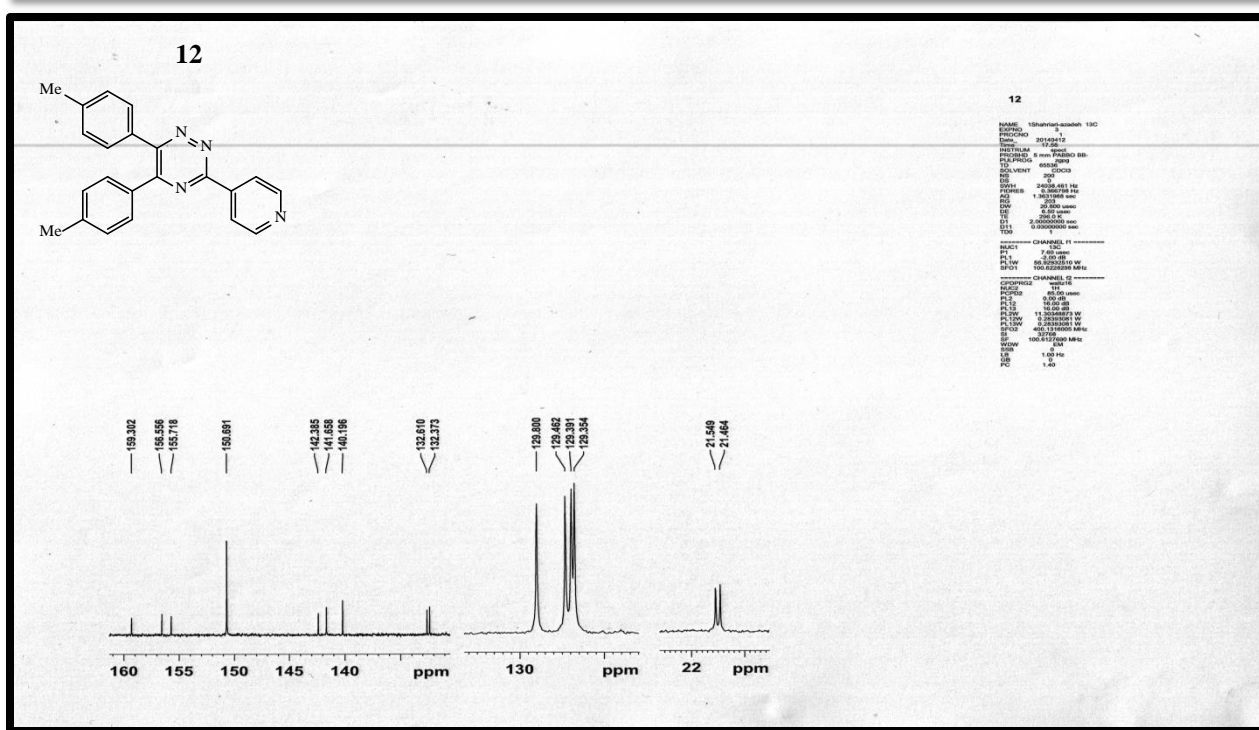

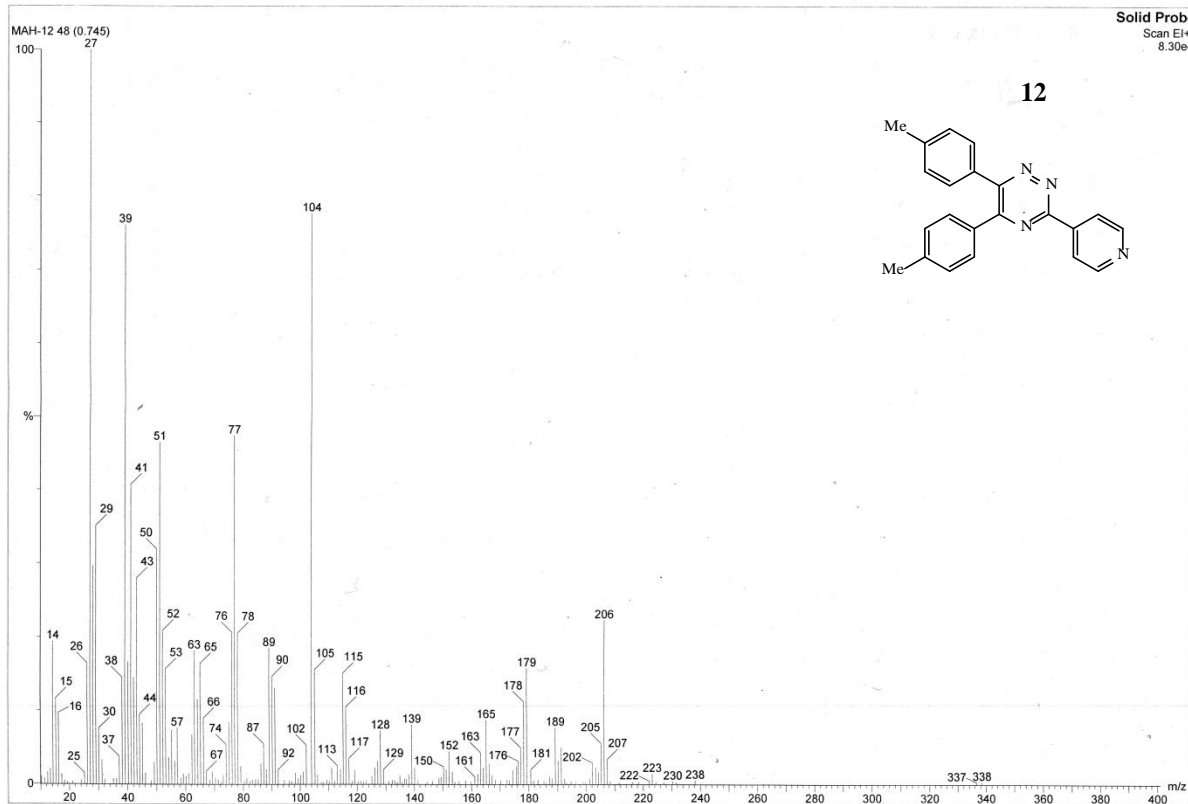

13. **3-(3-Methoxyphenyl)-5,6-bis(4-methoxyphenyl)-1,2,4-triazine (Table 2, entry 13):**  
Yellow powder. Mp: 139-140 °C; IR (KBr): 3070, 2936, 2836, 1604, 1579, 1498, 1255, 1175; <sup>1</sup>H NMR (400 MHz CDCl<sub>3</sub>): δ<sub>H</sub> (ppm) 3.86 (s, OCH<sub>3</sub>, 3H), 3.86 (s, OCH<sub>3</sub>, 3H), 3.94 (s, OCH<sub>3</sub>, 3H), 6.89-8.25 (m, CH aromatic, 12H). <sup>13</sup>C NMR (100 MHz, CDCl<sub>3</sub>): δ<sub>c</sub> (ppm) 55.33, 55.39, 55.48, 112.64, 113.98, 114.11, 117.79, 120.75, 128.14, 128.18, 129.80, 130.75, 131.54, 136.42, 154.57, 154.80, 160.01, 160.45, 160.72, 161.75. MS: *m/z* 399.

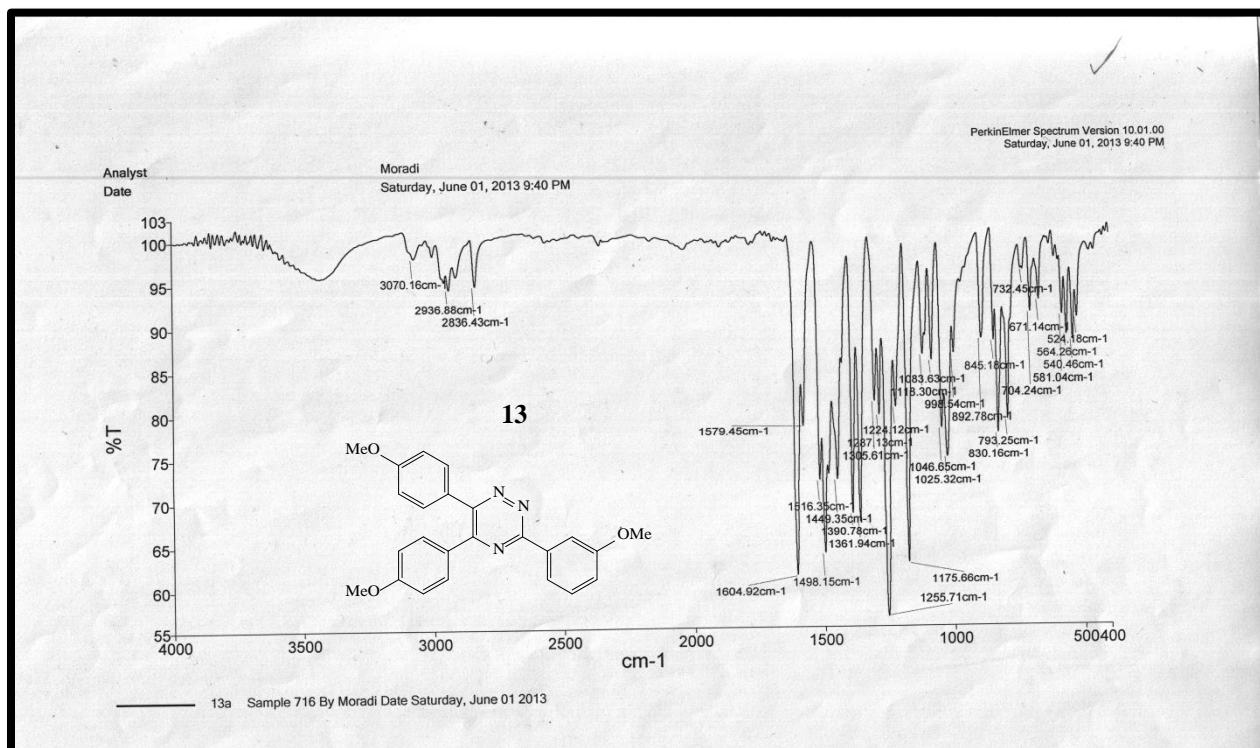

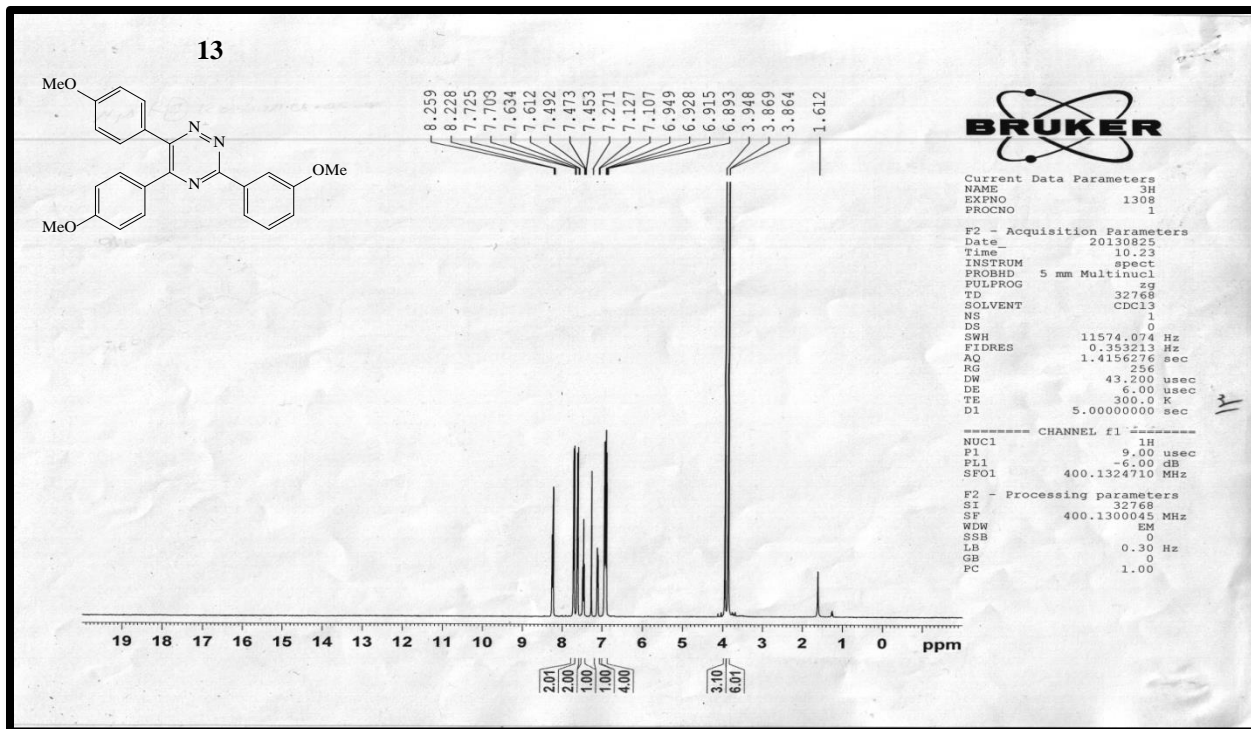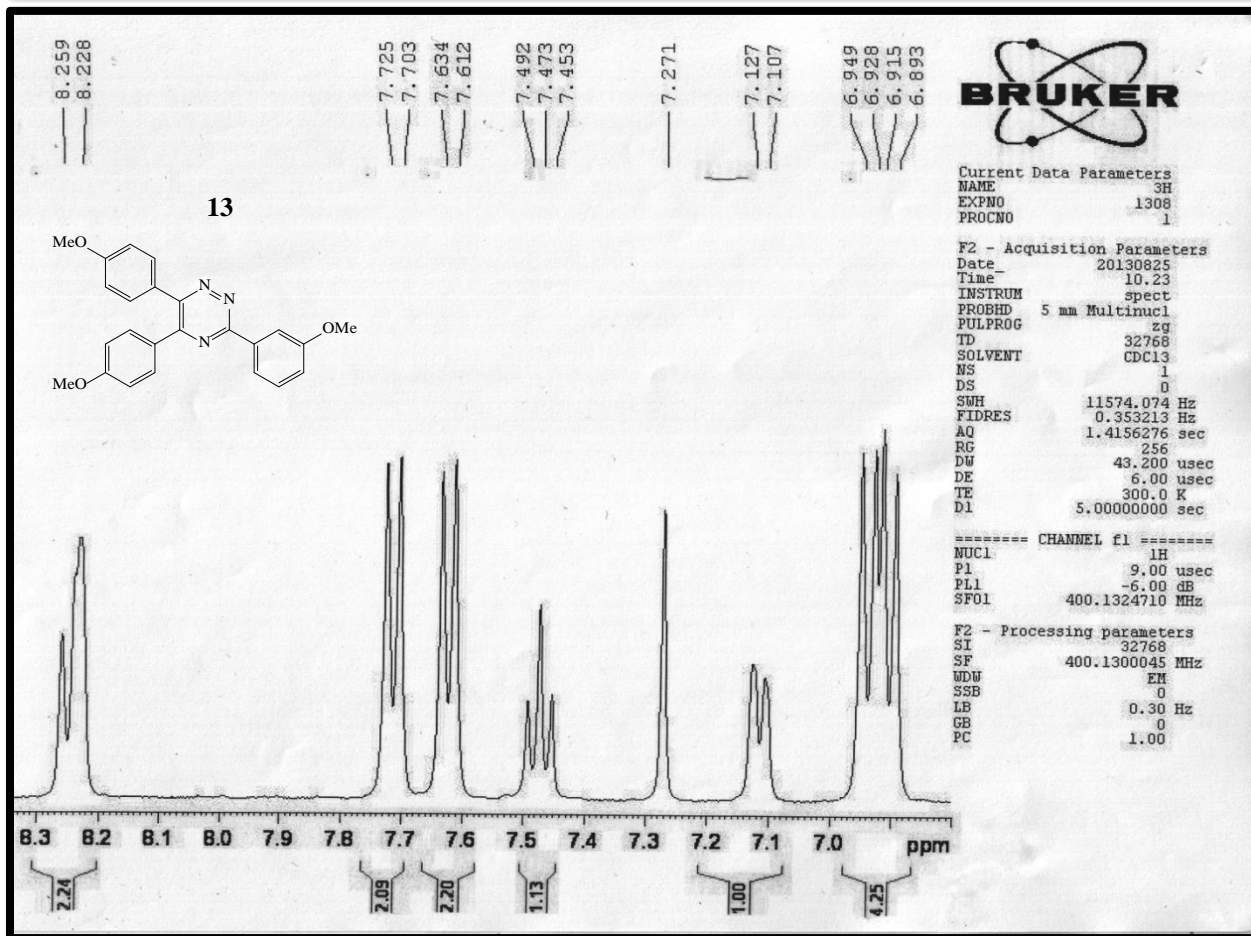

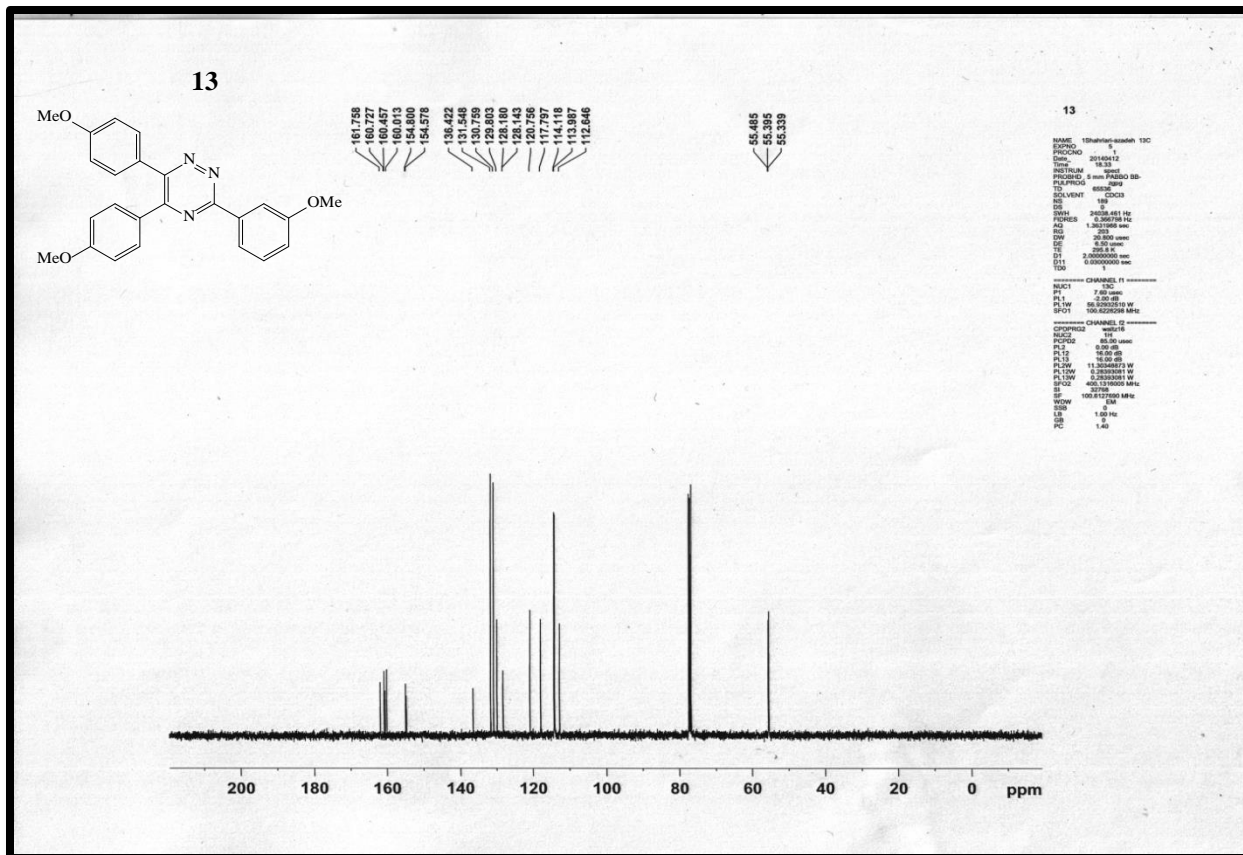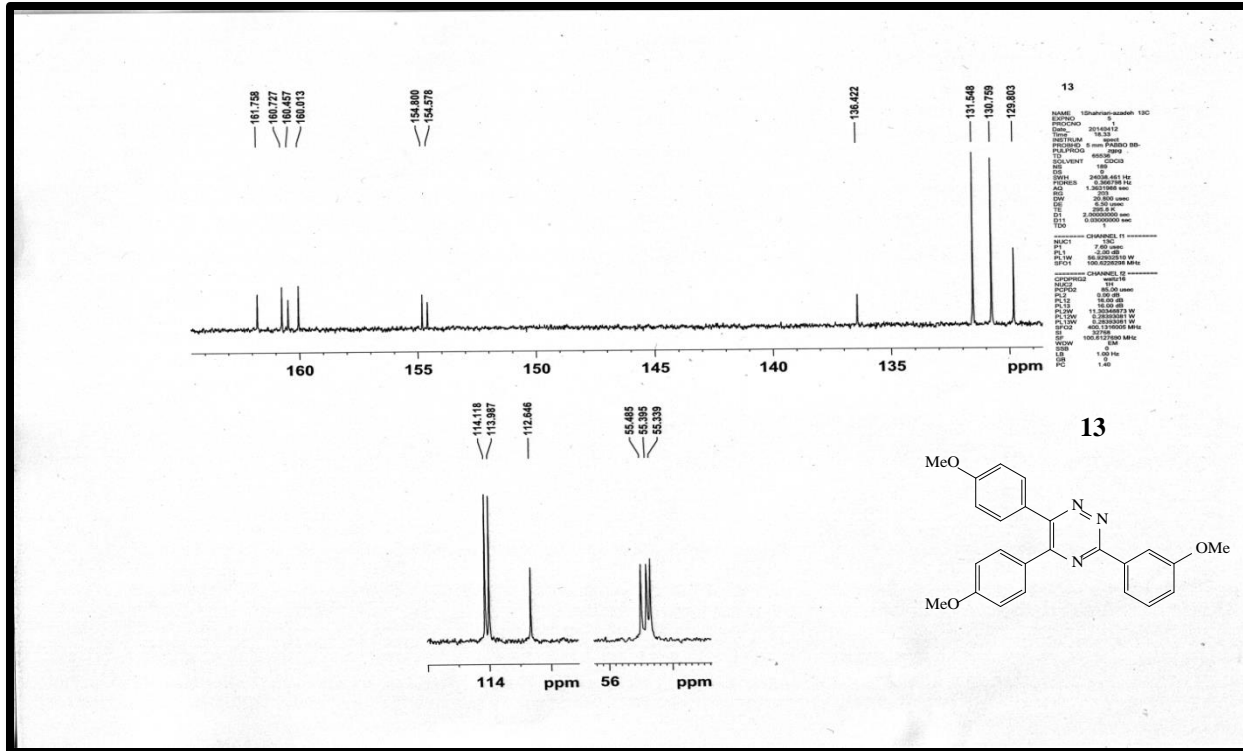



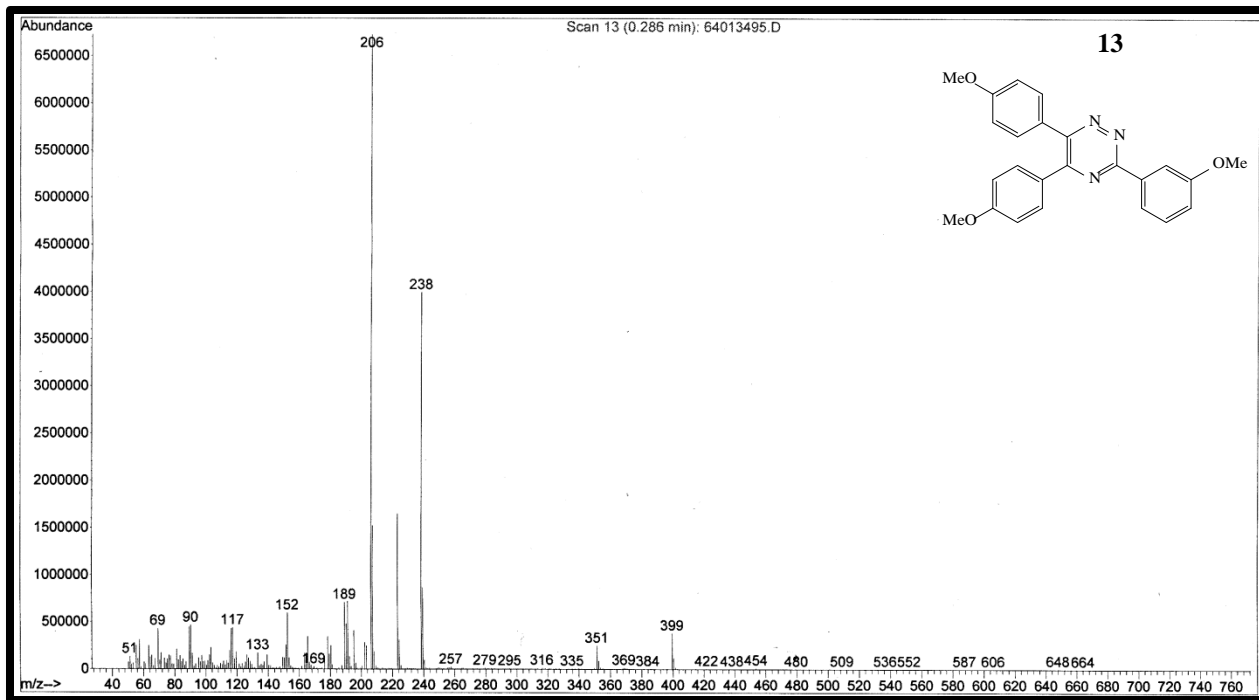

14. **3,5,6-Triphenyl-1,2,4-triazine (Table 2, entry 14):** Yellow powder. Mp: 145-146 °C; IR (KBr):3058,2923,1600,1577,1504,1391; <sup>1</sup>H NMR (90 MHz DMSO-d<sub>6</sub>): δ<sub>H</sub> (ppm) 7.10-8.50 (m,CH aromatic,15H)

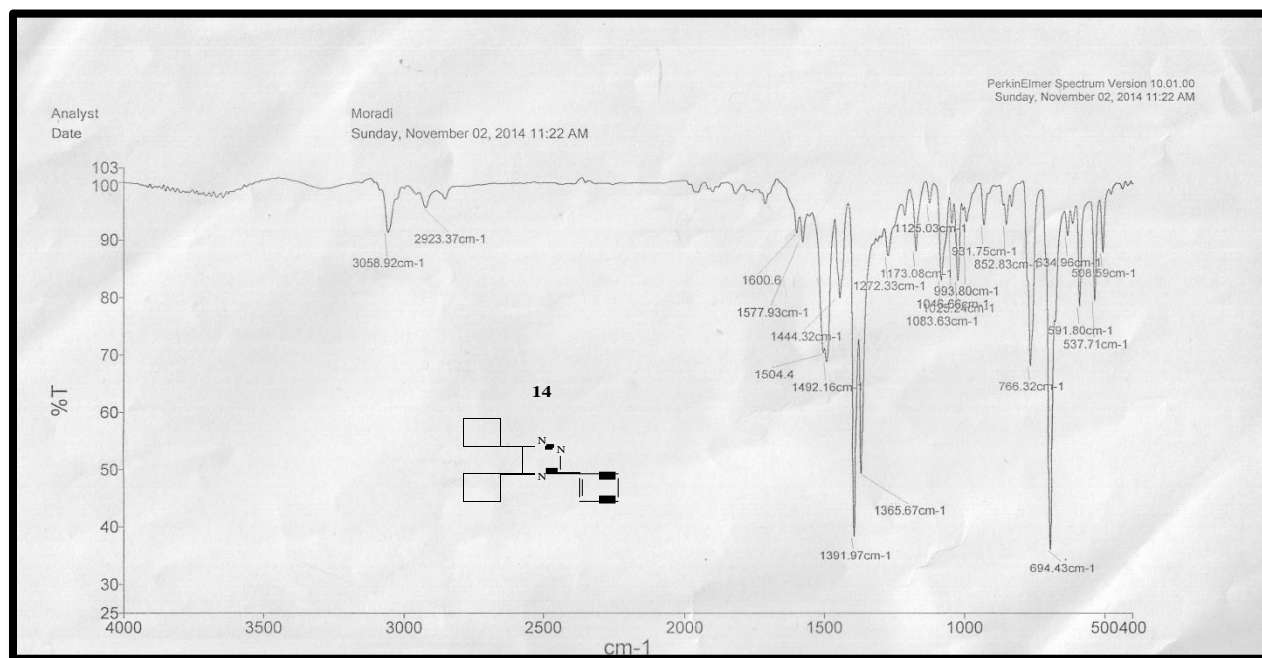

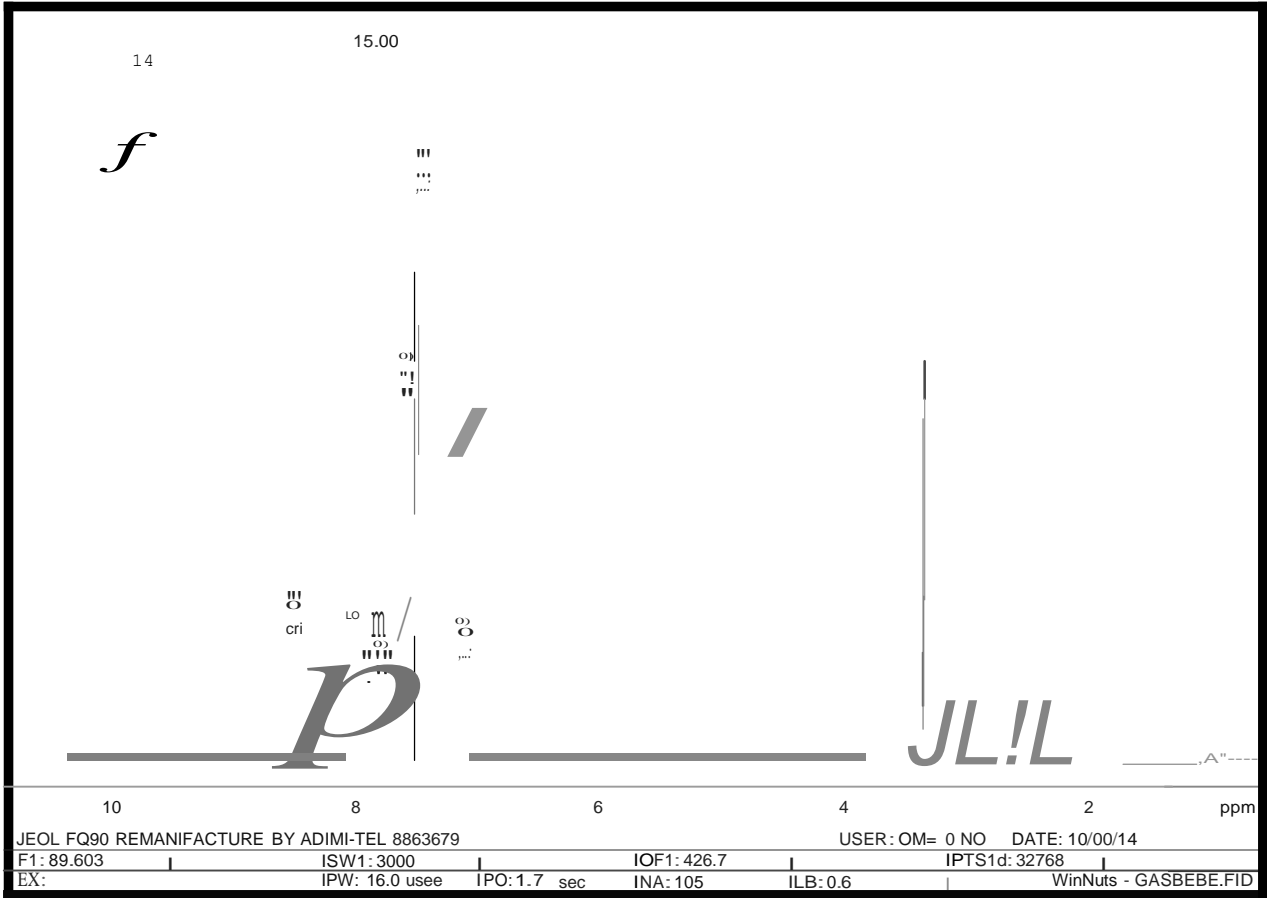

Supplement: c4ra10892b1.pdf [file c4ra10892b1.pdf]
